# Supplementary material for: Optical resolution of pseudo-para-disubstituted [2.2]paracyclophane: a chiral building block for optically active helicene-stacked molecules emitting circularly polarized luminescence
Source: Royal Society of Chemistry journal article supplement (doi:10.1039/d2tc04652k), 2022-12-20
Supplement: d2tc04652k1.pdf [file d2tc04652k1.pdf]

*Supporting Information*

**Optical resolution of pseudo-*para*-disubstituted [2.2]paracyclophane: chiral building block for optically active helicene-stacked molecules emitting circularly polarized luminescence**

Asuka Yanagawa, Motoki Tsuchiya, Ryo Inoue and Yasuhiro Morisaki\*

Department of Applied Chemistry for Environment, School of Biological and Environmental Sciences,  
Kwansei Gakuin University,  
1 Gakuen Uegahara, Sanda, Hyogo 669-1330, Japan

E-mail: ymo@kwansei.ac.jp (Y.M.)

## General

$^1\text{H}$  and  $^{13}\text{C}$  spectra were recorded on a JEOL JNM ECZ-500R instrument at 500 and 125 MHz, respectively. Samples were analyzed in  $\text{CDCl}_3$ , and the chemical shift values were expressed relative to  $\text{Me}_4\text{Si}$  as an internal standard. Analytical thin layer chromatography (TLC) was performed with silica gel 60 Merck F<sub>254</sub> plates. Column chromatography was performed with Wakogel C-300  $\text{SiO}_2$ . Flash column chromatography and recyclable preparative high-performance liquid chromatography (HPLC) were carried out on a YMC LC Forte/R or Japan Analytical Industry LaboACE LC-5060. Diastereomer ratio (dr) was confirmed by a HPLC (TOSOH UV-8020) equipped with a Daicel Chiralpak<sup>®</sup> IA column (0.46 cm  $\times$  25 cm, solvent flow rate 0.5 mL/min). High-resolution mass (HRMS) spectra were obtained on a Bruker Daltonics microTOF II for atmospheric pressure chemical ionization (APCI) or electrospray ionization (ESI). UV-vis spectra were recorded on a JASCO V-730 spectrophotometer, and samples were analyzed in  $\text{CHCl}_3$  at room temperature. Photoluminescence (PL) spectra were recorded on a JASCO FP-8500 spectrofluorometer, and samples were analyzed in  $\text{CHCl}_3$  at room temperature. Absolute PL quantum efficiency was calculated on a JASCO FP8500 with an ILF-835 integrating sphere. Circular dichroism (CD) spectra were recorded on a JASCO J-1500 spectropolarimeter with  $\text{CHCl}_3$  as a solvent at room temperature; two scans were accumulated. Circularly polarized luminescence (CPL) spectra were recorded on a JASCO CPL-300 with  $\text{CHCl}_3$  as a solvent at room temperature. All samples for CPL were excited around 290 nm, and five scans were accumulated. Specific rotations ( $[\alpha]_D^t$ ) were measured with a HORIBA SEPA-500 polarimeter.

All reactions were carried out under  $\text{N}_2$  atmosphere.

## Materials

### Commercially available compounds used without purification:

(1*S*,4*R*)-Camphanoyl chloride (1*S*,4*R*)-**3**, Tf<sub>2</sub>O, styrene **6**, 2-vinylnaphthalene **8**

*n*-BuLi (1.55 M in hexane), B(OMe)<sub>3</sub>

NaOH, KOH, 30% H<sub>2</sub>O<sub>2</sub>, I<sub>2</sub>

Pd(OAc)<sub>2</sub>, Pd<sub>2</sub>(dba)<sub>3</sub>

P(*o*-tol)<sub>3</sub>, 2-dicyclohexylphosphino-2',6'-dimethoxybiphenyl (S-Phos)

Et<sub>2</sub>O, CH<sub>2</sub>Cl<sub>2</sub>, EtOH

Pyridine (dehydrated), toluene (dehydrated), THF (dehydrated), DMF (dehydrated)

Et<sub>3</sub>N was purchased and distilled over KOH under N<sub>2</sub>.

### Compounds prepared as described in the literature:

Pseudo-*para*-dibromo[2.2]paracyclophane **1**:

Reich, H. J.; Cram, D. J. *J. Am. Chem. Soc.* **1969**, *91*, 3527–3533.

(*S*<sub>p</sub>)- and (*R*<sub>p</sub>)-**11**:

Tsuchiya, M.; Maeda, H.; Inoue, R.; Morisaki, Y. *Chem. Commun.* **2021**, *57*, 9256–9259.

## X-ray structure determination

Crystals suitable for X-ray diffraction studies were analyzed using a Rigaku MicroMax-007HFM MoKa rotating anode generator equipped with VariMax optics, an AFC1 goniometer, and Saturn 724+ detector. The reflection data for them was integrated, scaled and averaged using Rigaku CrysAlis<sup>PRO</sup>. The structures were solved by a direct method (SHELXT) and refined using a full-matrix least-squares method on F2 for all reflections (SHELXL-2018/3). The calculations were performed on Olex2 program package. Crystallographic data are given in Tables S1–S5. Deposition numbers 2214406 ((*S*<sub>p</sub>,1*S*,4*R*)-**4**), 2214407 ((*R*<sub>p</sub>,1*S*,4*R*)-**4**), 2214408 ((*S*<sub>p</sub>)-**9**), 2214409 ((*R*<sub>p</sub>)-**10**), and 2214410 ((*R*<sub>p</sub>)-**14**) contains the supplementary crystallographic data for this paper. These data are provided free of charge by the joint Cambridge Crystallographic Data Centre and Fachinformationszentrum Karlsruhe Access Structures service [www.ccdc.cam.ac.uk/structures](http://www.ccdc.cam.ac.uk/structures).

## Computational methods

DFT and TD-DFT calculations<sup>1–5</sup> were carried out by using the Gaussian 16 program package<sup>6</sup>, with the 6-31G(d)<sup>7–9</sup> basis set for C and H atoms. Optimized geometries and their molecular orbitals in the ground and S<sub>1</sub> states were determined by DFT and TD-DFT calculations with the CAM-B3LYP<sup>10</sup> functional and integral equation formalism polarizable continuum model (IEF-PCM)<sup>11</sup> method for solvation effect. Cartesian coordinates of all optimized structures are given in Tables S8–S11. The energy levels, electronic configurations, CD, and CPL properties in the singlet excited states were estimated from TD-DFT calculations with the same level of theory.

1. M. E. Casida, C. Jamorski, K. C. Casida, D. R. Salahub, *J. Chem. Phys.* **1998**, *108*, 4439–4449.
2. R. E. Stratmann, G. E. Scuseria, M. J. Frisch, *J. Chem. Phys.* **1998**, *109*, 8218–8224.
3. R. Bauernschmitt, R. Ahlrichs, *Chem. Phys. Lett.* **1996**, *256*, 454–464.
4. C. Adamo, D. Jacquemin, *Chem. Soc. Rev.* **2013**, *42*, 845–856.
5. C. Adamo, T. Le Bahers, M. Savarese, L. Wilbraham, G. García, R. Fukuda, M. Ehara, N. Rega, I. Ciofini, *Coord. Chem. Rev.* **2015**, *304–305*, 166–178.
6. Gaussian 16, Revision B.01, M. J. Frisch, et al., Gaussian, Inc., Wallingford CT, 2016.

7. M. M. Francl, W. J. Pietro, W. J. Hehre, J. S. Binkley, M. S. Gordon, D. J. DeFrees, J. A. Pople, *J. Chem. Phys.* **1982**, *77*, 3654–3665.
8. P. C. Hariharan, J. A. Pople, *Theor. Chim. Acta* **1973**, *28*, 213–222.
9. T. Clark, J. Chandrasekhar, G. W. Spitznagel, P. V. R. Schleyer, *J. Comput. Chem.* **1983**, *4*, 294–0.
10. T. Yanai, D. Tew, N. Handy, *Chem. Phys. Lett.* **2004**, *393*, 51–57.
11. M. T. Cancès, B. Mennucci, J. Tomasi, *J. Chem. Phys.* **1997**, *107*, 3032–3041.

## Synthesis of *rac*-2

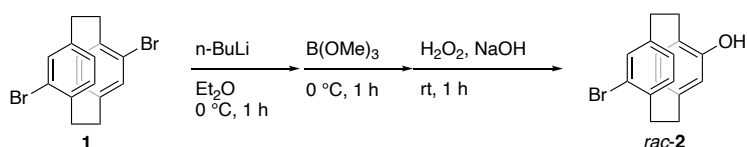

A solution of *n*-BuLi (1.55 M in hexane, 11.3 mL, 17.5 mmol) was slowly added to a solution of **1** (4.94 g, 13.5 mmol) in Et<sub>2</sub>O (21 mL) at 0 °C. After 1 h, B(OMe)<sub>3</sub> (3.0 mL, 26.8 mmol) was added, and then the mixture was warmed to room temperature. After 1 h, aqueous NaOH (1.0 M, 8.7 mL, 8.7 mmol) and aqueous H<sub>2</sub>O<sub>2</sub> (30%, 5.7 mL, 55.9 mmol) were added, and the mixture was stirred for 1 h at room temperature. After the saturated aqueous NaHCO<sub>3</sub> solution was added to the reaction mixture, the organic layer was extracted with CH<sub>2</sub>Cl<sub>2</sub> three times. The combined organic layer was washed with brine and dried over MgSO<sub>4</sub>. MgSO<sub>4</sub> was removed by filtration, and the solvent was evaporated. The residue was purified by column chromatography on SiO<sub>2</sub> (CHCl<sub>3</sub> as an eluent) to afford *rac*-**2** (2.89 g, 9.5 mmol, 71%) as a pale yellow crystal.

$R_f = 0.35$  (CHCl<sub>3</sub> as an eluent).

<sup>1</sup>H and <sup>13</sup>C NMR spectra were matched with the literature's data.

Delcourt, M.-L.; Reynaud, C.; Turcaud, S.; Favereau, L.; Crassous, J.; Micouin, L.; Benedetti, E. *J. Org. Chem.* **2019**, *84*, 888–899.

Optical resolution: synthesis of (*S<sub>p</sub>*,1*S*,4*R*)- and (*R<sub>p</sub>*,1*S*,4*R*)-4

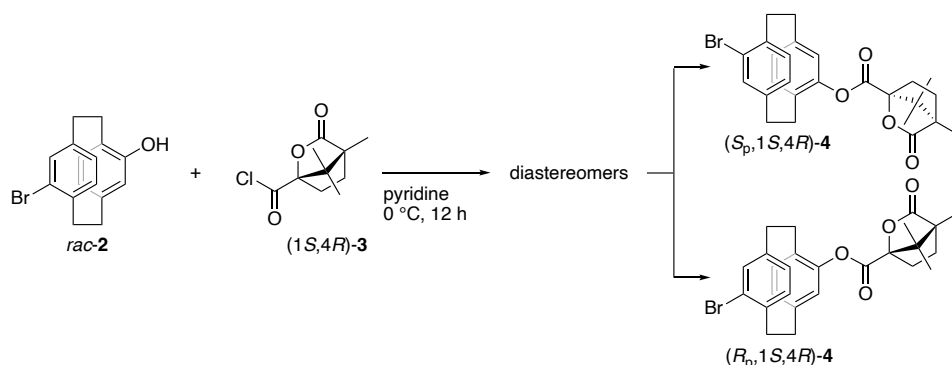

A mixture of *rac*-2 (3.67 g, 12.1 mmol) and (1*S*,4*R*)-camphanoyl chloride (5.25 g, 24.2 mmol) was placed in a round-bottom flask equipped with a magnetic stirring bar. After degassing the reaction mixture several times, dry pyridine (101 mL) was added to the mixture at 0 °C, and the reaction was carried out at room temperature for 12 h with stirring. After the reaction mixture was cooled to 0 °C, 6 M HCl was added, and organic species were extracted with CH<sub>2</sub>Cl<sub>2</sub> three times. The combined organic layer was washed with aqueous NaHCO<sub>3</sub>, and brine. The organic layer was dried over MgSO<sub>4</sub>. MgSO<sub>4</sub> was removed, and the solvent was evaporated. The residue was separated by SiO<sub>2</sub> column chromatography (CHCl<sub>3</sub>/EtOAc = 1000/2.5 v/v as an eluent) to afford (*S<sub>p</sub>*,1*S*,4*R*)-4 (*R<sub>f</sub>* = 0.38) and (*R<sub>p</sub>*,1*S*,4*R*)-4 (*R<sub>f</sub>* = 0.28) as white powders. Each diastereomer was purified by recrystallization from CHCl<sub>3</sub>/MeOH to afford (*S<sub>p</sub>*,1*S*,4*R*)-4 (2.17 g, 4.5 mmol, 37%) and (*R<sub>p</sub>*,1*S*,4*R*)-4 (2.20 g, 4.6 mmol, 38%).

(*R<sub>p</sub>*,1*S*,4*R*)-4: <sup>1</sup>H NMR (CDCl<sub>3</sub>, 500 MHz) δ 1.15 (s, 3H), 1.18 (s, 3H), 1.21 (s, 3H), 1.77–1.84 (m, 1H), 1.99–2.06 (m, 1H), 2.19–2.26 (m, 1H), 2.56–2.63 (m, 1H), 2.72–2.86 (m, 2H), 2.93–3.03 (m, 2H), 3.07–3.21 (m, 3H), 3.46–3.53 (m, 1H), 6.04 (d, *J* = 1.7 Hz, 1H), 6.42 (d, *J* = 8.0 Hz, 1H), 6.48 (d, *J* = 1.7 Hz, 1H), 6.52 (d, *J* = 8.0 Hz, 1H), 6.94 (dd, *J* = 1.7, 1.7 Hz, 1H), 7.12 (dd, *J* = 1.7, 1.7 Hz, 1H) ppm; <sup>13</sup>C {<sup>1</sup>H} NMR (CDCl<sub>3</sub>, 125 MHz) δ 9.8, 16.8, 17.0, 28.9, 30.9, 31.1, 32.7, 33.5, 35.3, 54.6, 55.0, 90.9, 126.7, 127.7, 127.8, 127.8, 129.1, 130.4, 134.1, 134.1, 134.4, 137.5, 138.6, 141.3, 148.5, 165.6, 178.3 ppm. HRMS (ESI+) calcd for C<sub>26</sub>H<sub>27</sub>BrO<sub>4</sub>+Na<sup>+</sup>: 505.0985, found 505.0987. [α]<sup>25</sup><sub>D</sub> = −55.28 (*c* 0.20, CHCl<sub>3</sub>).

(*S<sub>p</sub>*,1*S*,4*R*)-4: <sup>1</sup>H NMR (CDCl<sub>3</sub>, 500 MHz) δ 1.17 (s, 3H), 1.20 (s, 3H), 1.21 (s, 3H), 1.79–1.86 (m,

1H), 2.00–2.08 (m, 1H), 2.23–2.31 (m, 1H), 2.56–2.64 (m, 1H), 2.71–2.87 (m, 2H), 2.93–3.22 (m, 5H), 3.46–3.53 (m, 1H), 6.07 (d,  $J = 1.7$  Hz, 1H), 6.45 (d,  $J = 8.0$  Hz, 1H), 6.48 (d,  $J = 1.7$  Hz, 1H), 6.52 (d,  $J = 8.0$  Hz, 1H), 6.94 (dd,  $J = 1.7, 1.7$  Hz, 1H), 7.12 (dd,  $J = 1.7, 1.7$  Hz, 1H) ppm;  $^{13}\text{C}\{^1\text{H}\}$  NMR ( $\text{CDCl}_3$ , 125 MHz)  $\delta = 9.8, 16.9, 16.9, 29.0, 31.1, 31.2, 32.7, 33.5, 35.3, 54.5, 55.0, 90.9, 126.8, 127.7, 127.8, 129.1, 130.4, 134.1, 134.4, 137.5, 138.6, 141.2, 141.3, 148.5, 165.5, 178.1$  ppm. HRMS (ESI+) calcd for  $\text{C}_{26}\text{H}_{27}\text{BrO}_4 + \text{Na}^+$ : 505.0985, found 505.0969.  $[\alpha]_{\text{D}}^{25} = +55.48$  ( $c$  0.20,  $\text{CHCl}_3$ ).



**(*S<sub>p</sub>*,1*S*,4*R*)-4**

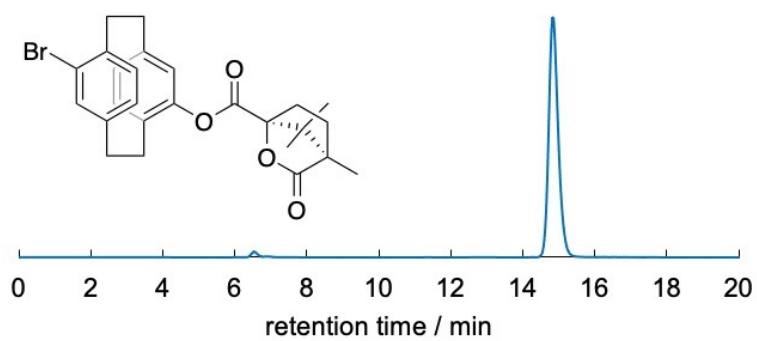

**(*R<sub>p</sub>*,1*S*,4*R*)-4**

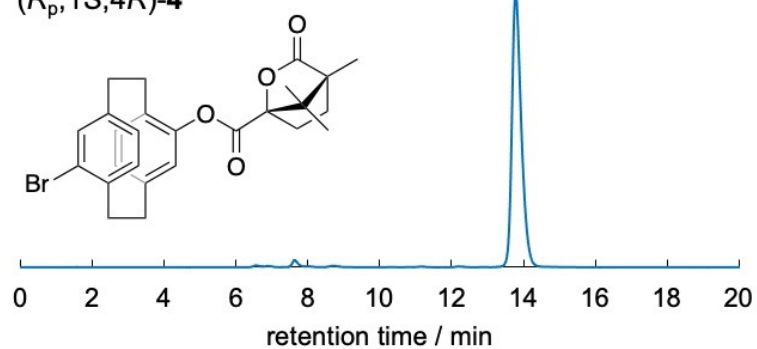

**diastereomers**

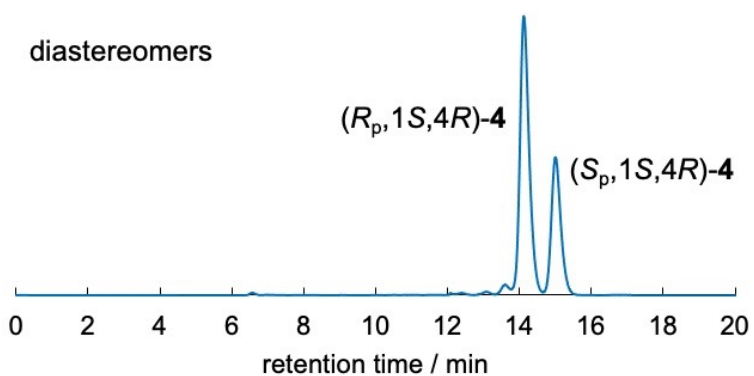

Colum: Chiralpak® IA, 0.46 cm × 25 cm.

Eluent: hexane/THF = 8/2 v/v.

Flow rate: 0.5 mL/min.

**Fig. S1.** Chromatograms of (*S<sub>p</sub>*,1*S*,4*R*)-4, (*R<sub>p</sub>*,1*S*,4*R*)-4, and diastereomers.

(A)

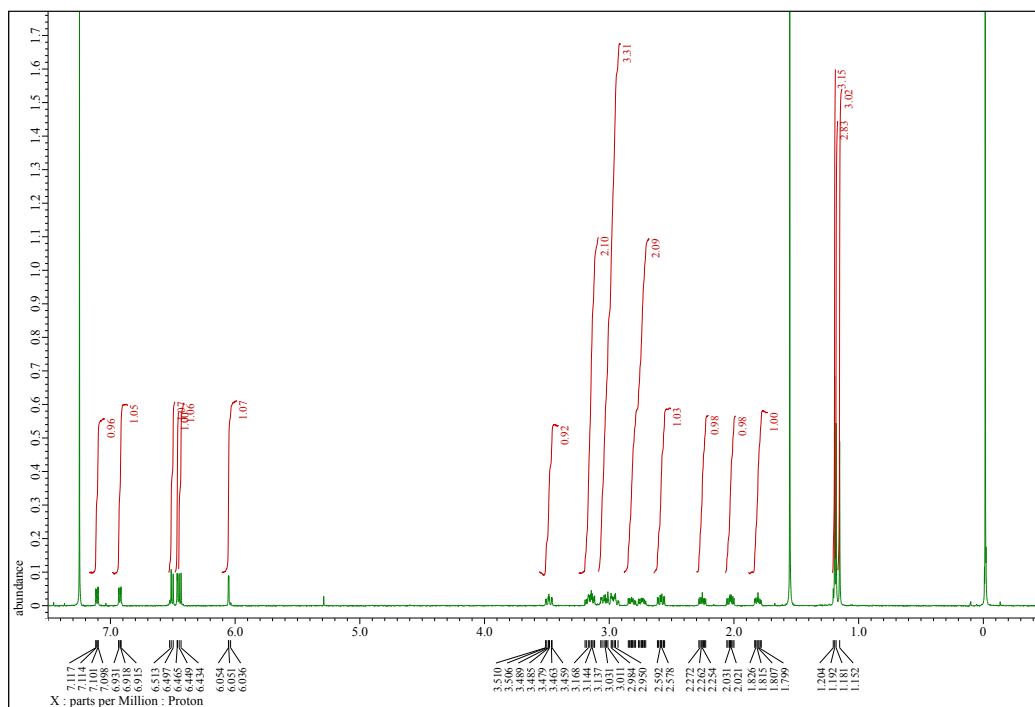

(B)

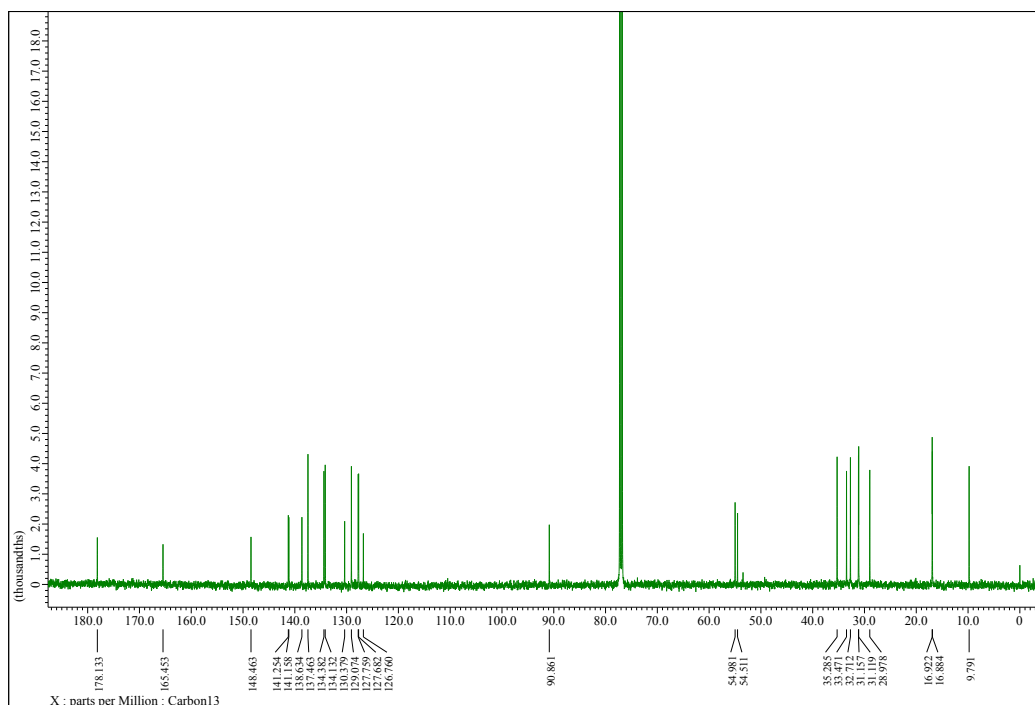

**Fig. S2.** (A)  $^1\text{H}$  NMR spectrum and (B)  $^{13}\text{C}\{^1\text{H}\}$  NMR spectrum of ( $S_p,1S,4R$ )-4 in  $\text{CDCl}_3$ .

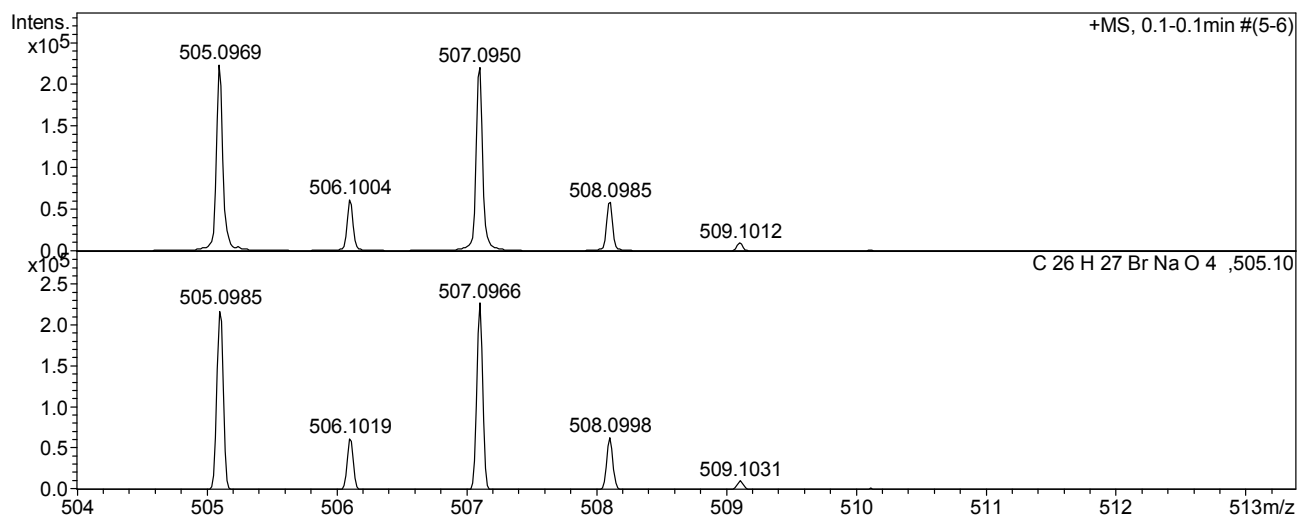

**Fig. S3.** Mass spectra of (*S<sub>p</sub>*,1*S*,4*R*)-**4**. Upper and lower show observed and calculated spectra, respectively.

(A)

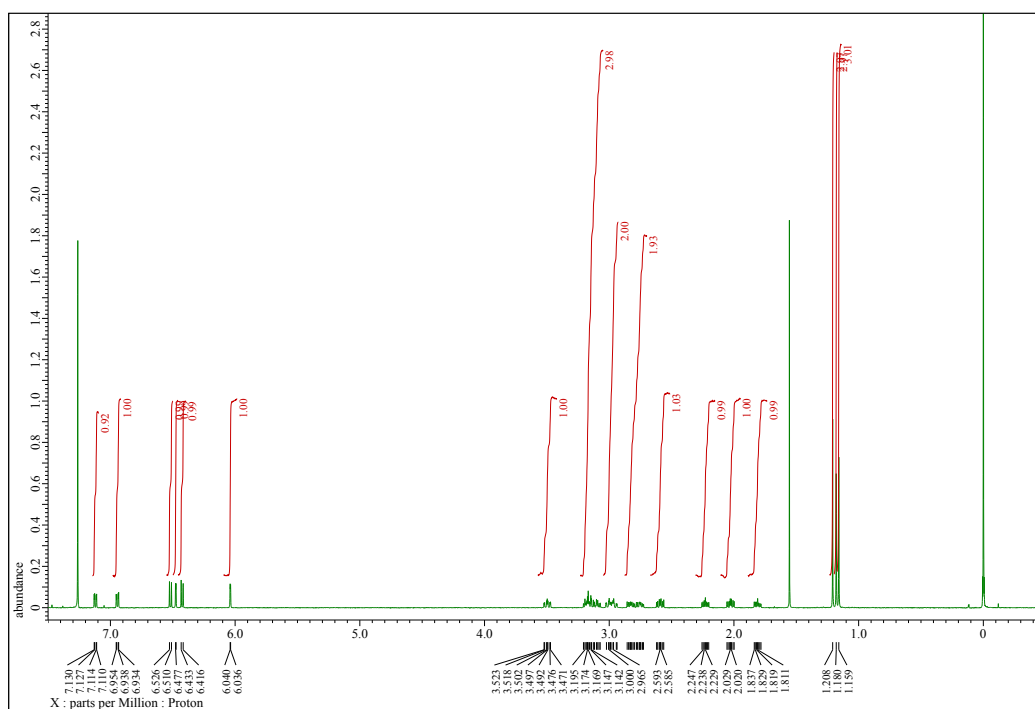

(B)

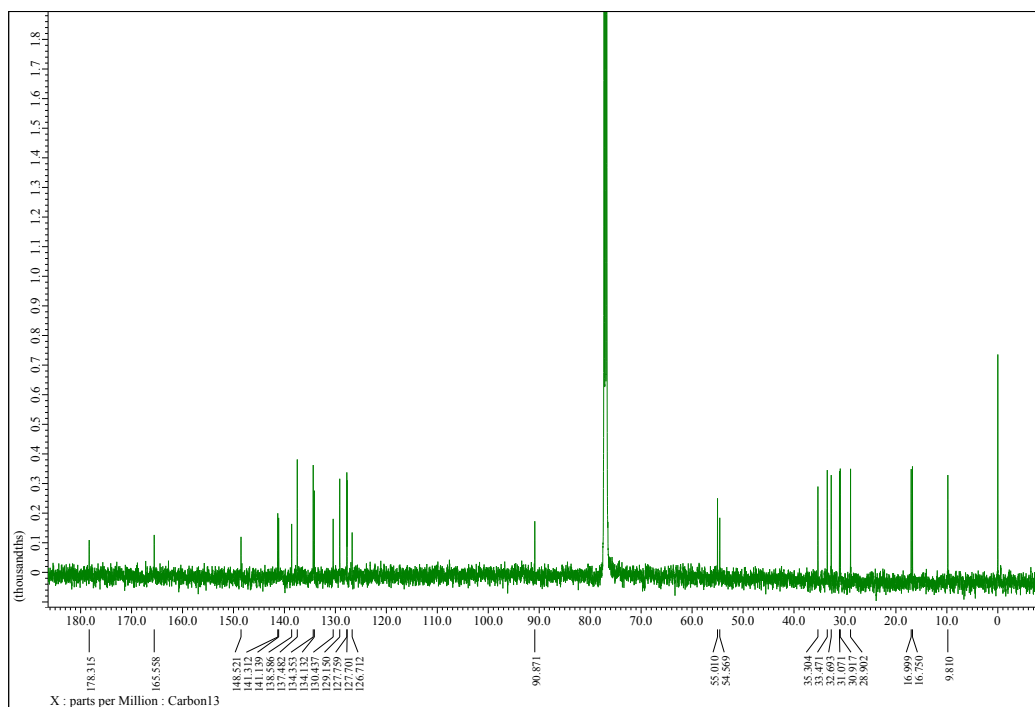

**Fig. S4.** (A)  $^1\text{H}$  NMR spectrum and (B)  $^{13}\text{C}\{^1\text{H}\}$  NMR spectrum of ( $R_p,1S,4R$ )-**4** in  $\text{CDCl}_3$ .

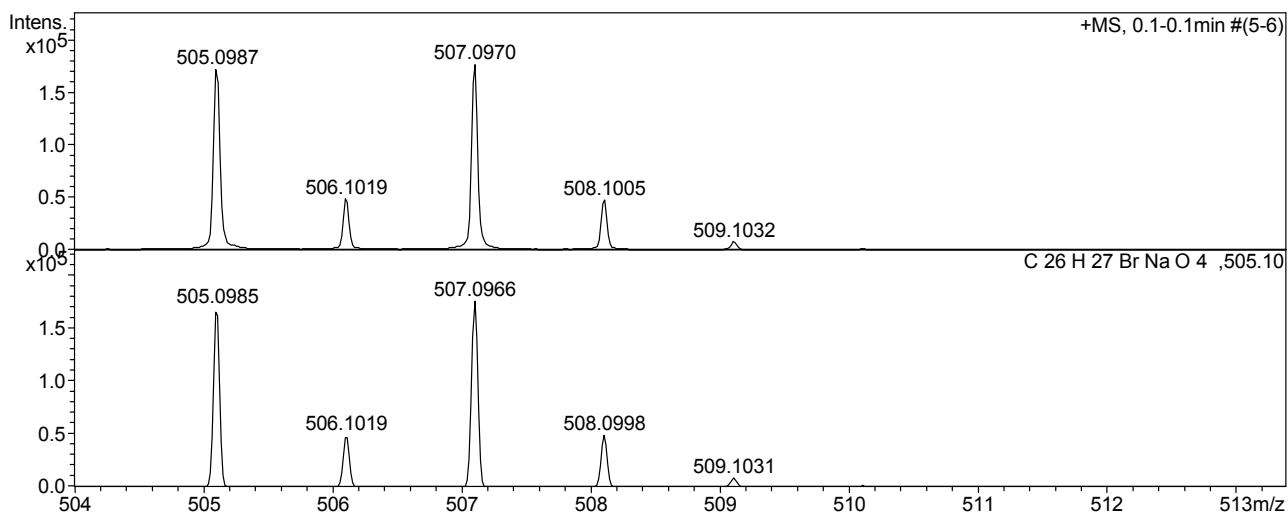

**Fig. S5.** Mass spectra of  $(R_p,1S,4R)$ -4. Upper and lower show observed and calculated spectra, respectively.

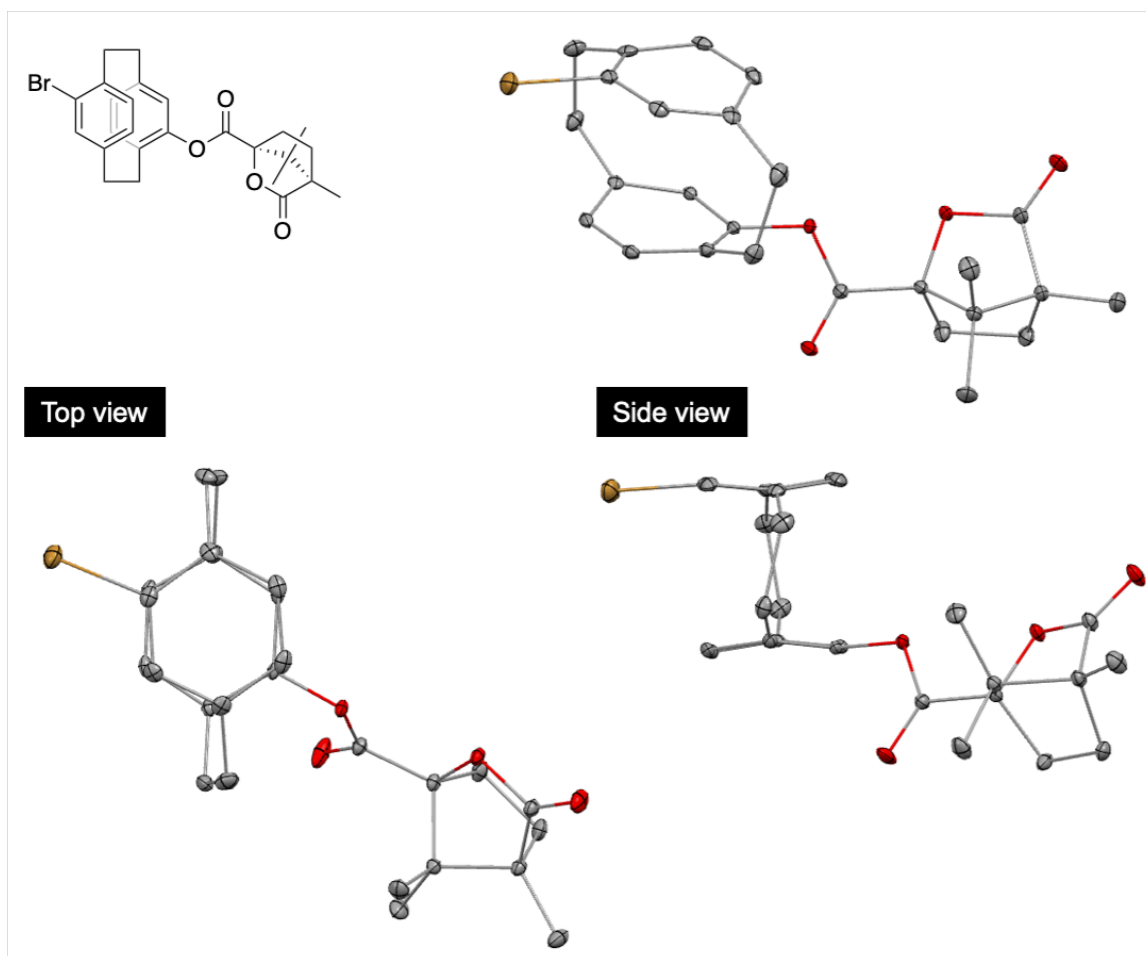

**Fig. S6.** ORTEP drawings of  $(S_p,1S,4R)$ -4 (CCDC-2214406). Thermal ellipsoids are drawn at the 30% probability level. Hydrogen atoms are omitted for clarity.

**Table S1.** Crystallographic data for (*S<sub>p</sub>*,1*S*,4*R*)-4.

|                                                                            |                                                  |
|----------------------------------------------------------------------------|--------------------------------------------------|
| Formula                                                                    | C <sub>26</sub> H <sub>27</sub> BrO <sub>4</sub> |
| Formula weight                                                             | 483.38                                           |
| Temperature (K)                                                            | 150                                              |
| Crystal color, habit                                                       | colourless, plate                                |
| Crystal size, mm                                                           | 0.3 × 0.3 × 0.05                                 |
| Crystal system                                                             | monoclinic                                       |
| Space group                                                                | <i>P</i> 2 <sub>1</sub> (#4)                     |
| <i>a</i> , Å                                                               | 7.4207(2)                                        |
| <i>b</i> , Å                                                               | 10.8719(2)                                       |
| <i>c</i> , Å                                                               | 13.8261(4)                                       |
| $\alpha$ , deg                                                             | 90                                               |
| $\beta$ , deg                                                              | 105.401(3)                                       |
| $\gamma$ , deg                                                             | 90                                               |
| <i>V</i> , Å <sup>3</sup>                                                  | 1075.39(5)                                       |
| <i>Z</i> value                                                             | 2                                                |
| <i>D</i> <sub>calcd</sub> , g cm <sup>-3</sup>                             | 1.493                                            |
| $\mu$ (MoK $\alpha$ ), cm <sup>-1</sup>                                    | 19.43                                            |
| <i>F</i> (000)                                                             | 500                                              |
| 2 $\theta$ <sub>max</sub> , deg                                            | 62.322                                           |
| No. of reflections measured                                                | 7744                                             |
| No. of observed reflections                                                | 4450                                             |
| No. of variables                                                           | 283                                              |
| <i>R</i> <sub>1</sub> ( <i>I</i> > 2 $\sigma$ ( <i>I</i> )) <sup>[a]</sup> | 0.0368(4337)                                     |
| w <i>R</i> <sub>2</sub> (all reflns) <sup>[b]</sup>                        | 0.1049(4450)                                     |
| Goodness of fit                                                            | 1.078                                            |
| Flack Parameter                                                            | 0.008(9)                                         |

[a]  $R_1 = \Sigma(|F_o| - |F_c|) / \Sigma(|F_o|)$ . [b]  $wR_2 = [\Sigma[w(F_o^2 - F_c^2)^2] / \Sigma w(F_o^2)^2]^{1/2}$ .

Recrystallization solvent: chloroform / methanol

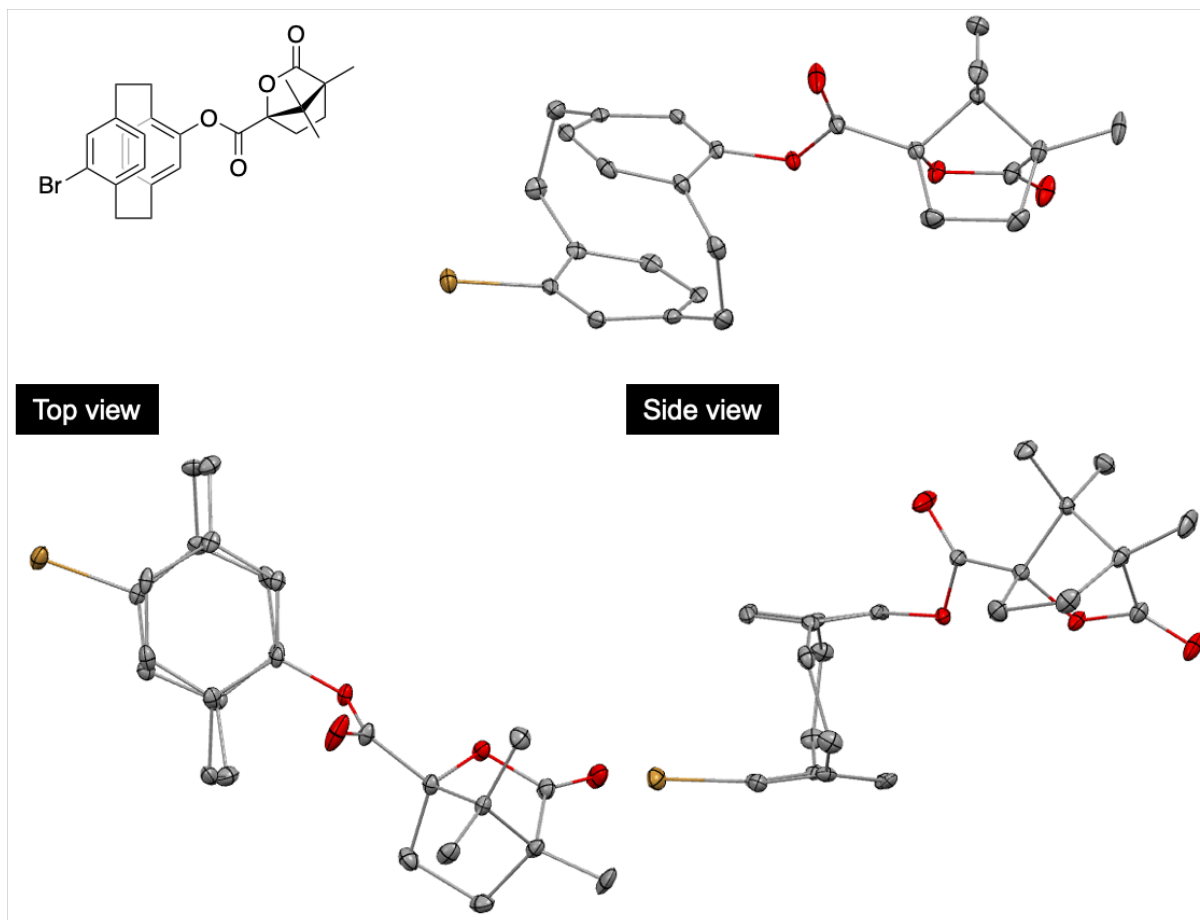

**Fig. S7.** ORTEP drawings of (*R<sub>p</sub>*,1*S*,4*R*)-4 (CCDC-2214407). Thermal ellipsoids are drawn at the 30% probability level. Hydrogen atoms are omitted for clarity.



**Table S2.** Crystallographic data for (*R<sub>p</sub>*,1*S*,4*R*)-4.

|                                                                            |                                                  |
|----------------------------------------------------------------------------|--------------------------------------------------|
| Formula                                                                    | C <sub>26</sub> H <sub>27</sub> BrO <sub>4</sub> |
| Formula weight                                                             | 483.38                                           |
| Temperature (K)                                                            | 150                                              |
| Crystal color, habit                                                       | colourless, plate                                |
| Crystal size, mm                                                           | 0.4 × 0.4 × 0.1                                  |
| Crystal system                                                             | monoclinic                                       |
| Space group                                                                | <i>P</i> 2 <sub>1</sub> (#4)                     |
| <i>a</i> , Å                                                               | 7.4466(3)                                        |
| <i>b</i> , Å                                                               | 10.9055(7)                                       |
| <i>c</i> , Å                                                               | 13.5554(6)                                       |
| $\alpha$ , deg                                                             | 90                                               |
| $\beta$ , deg                                                              | 99.584(4)                                        |
| $\gamma$ , deg                                                             | 90                                               |
| <i>V</i> , Å <sup>3</sup>                                                  | 1085.45(10)                                      |
| <i>Z</i> value                                                             | 2                                                |
| <i>D</i> <sub>calcd</sub> , g cm <sup>-3</sup>                             | 1.479                                            |
| $\mu$ (MoK $\alpha$ ), cm <sup>-1</sup>                                    | 19.25                                            |
| <i>F</i> (000)                                                             | 500                                              |
| 2 $\theta$ <sub>max</sub> , deg                                            | 62.188                                           |
| No. of reflections measured                                                | 5212                                             |
| No. of observed reflections                                                | 4724                                             |
| No. of variables                                                           | 283                                              |
| <i>R</i> <sub>1</sub> ( <i>I</i> > 2 $\sigma$ ( <i>I</i> )) <sup>[a]</sup> | 0.0577(4560)                                     |
| w <i>R</i> <sub>2</sub> (all reflns) <sup>[b]</sup>                        | 0.1589 (4724)                                    |
| Goodness of fit                                                            | 1.067                                            |
| Flack Parameter                                                            | -0.005(12)                                       |

[a]  $R_1 = \Sigma(|F_o| - |F_c|) / \Sigma(|F_o|)$ . [b]  $wR_2 = [\Sigma[w(F_o^2 - F_c^2)^2] / \Sigma w(F_o^2)^2]^{1/2}$ .

Recrystallization solvent : chloroform / methanol

## Synthesis of (*R<sub>p</sub>*)-**5**

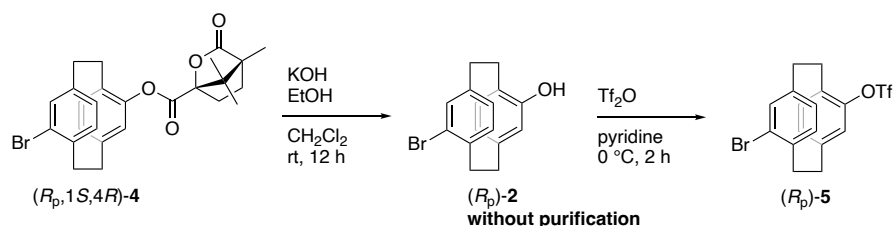

(*R<sub>p</sub>*,1*S*,4*R*)-**4** (2.00 g, 4.1 mmol), EtOH (116 mL) and CH<sub>2</sub>Cl<sub>2</sub> (72 mL) was placed in a round-bottom flask equipped with a magnetic stirring bar. After degassing the reaction mixture several times, an aqueous solution of KOH (2.9 g) was added to the mixture. After stirring for 12 h, 6 M HCl (16 mL) was added to the reaction mixture. The organic layer was separated and extracted with CH<sub>2</sub>Cl<sub>2</sub> three times. The combined organic layer was washed with aqueous NaHCO<sub>3</sub> and brine, and then dried over MgSO<sub>4</sub>. MgSO<sub>4</sub> was removed by filtration, and the solvent was evaporated. The solid of (*S<sub>p</sub>*)-**2** was used for the next reaction without further purification.

To a solution of (*R<sub>p</sub>*)-**2** in CH<sub>2</sub>Cl<sub>2</sub> (44 mL) were added pyridine (4.4 mL, 54.6 mmol) and Tf<sub>2</sub>O (2.2 mL, 13.1 mmol) at 0 °C. After being stirred for 2 h at room temperature, 6 M HCl was added to the reaction mixture. The organic layer was separated and extracted with CH<sub>2</sub>Cl<sub>2</sub> three times. The combined organic layer was washed with aqueous NaHCO<sub>3</sub> and brine, and then dried over MgSO<sub>4</sub>. MgSO<sub>4</sub> was removed by filtration, and the solvent was evaporated. The residue was purified by column chromatography on SiO<sub>2</sub> (AcOEt/hexane = 2/1 v/v as an eluent) to afford (*R<sub>p</sub>*)-**5** (1.75 g, 4.0 mmol, 97%) as a yellow liquid.

$R_f = 0.88$  (AcOEt / hexane = 2/1 v/v as an eluent). <sup>1</sup>H NMR (CDCl<sub>3</sub>, 500 MHz) δ 2.81–2.90 (m, 2H), 2.95–3.07 (m, 2H), 3.10–3.24 (m, 2H), 3.38–3.45 (m, 1H), 3.49–3.56 (m, 1H), 6.17 (d,  $J = 1.7$  Hz, 1H), 6.47 (d,  $J = 8.0$  Hz, 1H), 6.51 (d,  $J = 1.7$  Hz, 1H), 6.56 (d,  $J = 8.0$  Hz, 1H), 6.89 (dd,  $J = 2.3, 1.7$  Hz, 1H), 7.22 (dd,  $J = 1.7, 1.7$  Hz, 1H) ppm; <sup>13</sup>C{<sup>1</sup>H} NMR (CDCl<sub>3</sub>, 125 MHz) δ 31.0, 32.6, 33.5, 35.4, 117.6, 120.0, 127.0, 127.9, 128.8, 129.5, 131.6, 134.3, 135.1, 137.7, 138.8, 141.3, 142.3, 148.5 ppm. HRMS (APCI) calcd for C<sub>17</sub>H<sub>14</sub>BrF<sub>3</sub>O<sub>3</sub>S+H<sup>+</sup>: 434.9872, found 434.9866.  $[\alpha]_D^{25} = -91.79$  ( $c$  0.20, CHCl<sub>3</sub>).

(*S<sub>p</sub>*)-**5** was obtained in 91% yield by the same procedure of (*R<sub>p</sub>*)-**4**. HRMS (APCI) calcd. for C<sub>17</sub>H<sub>14</sub>BrF<sub>3</sub>O<sub>3</sub>S+H<sup>+</sup>: 434.9872, found 434.9868.  $[\alpha]_D^{25} = +91.61$  ( $c$  0.25, CHCl<sub>3</sub>).

(A)

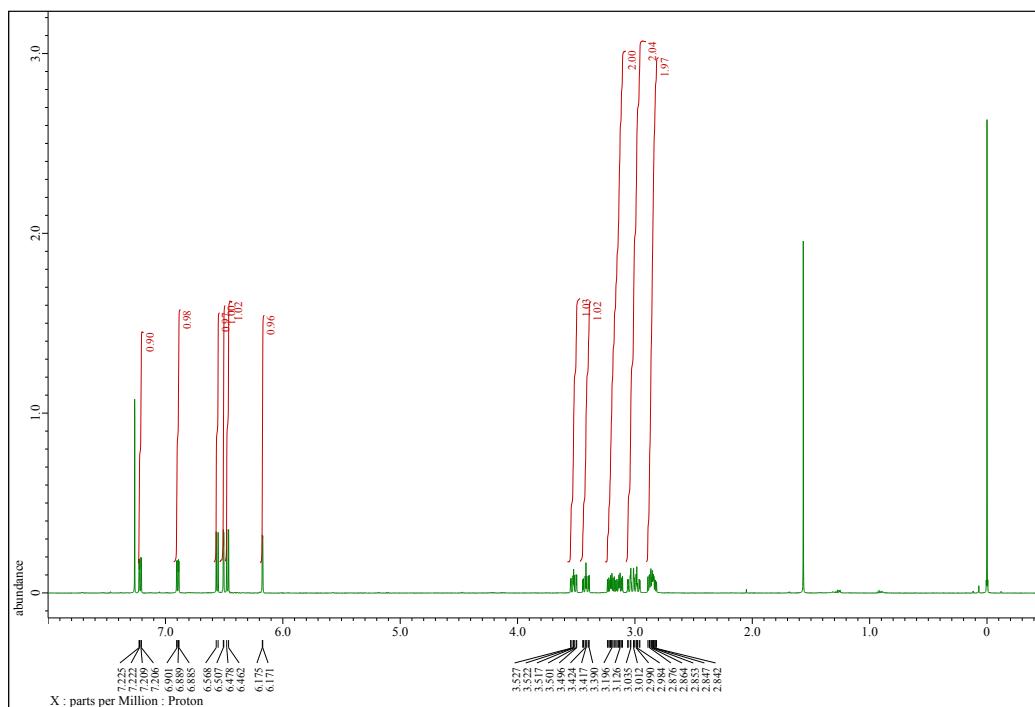

(B)

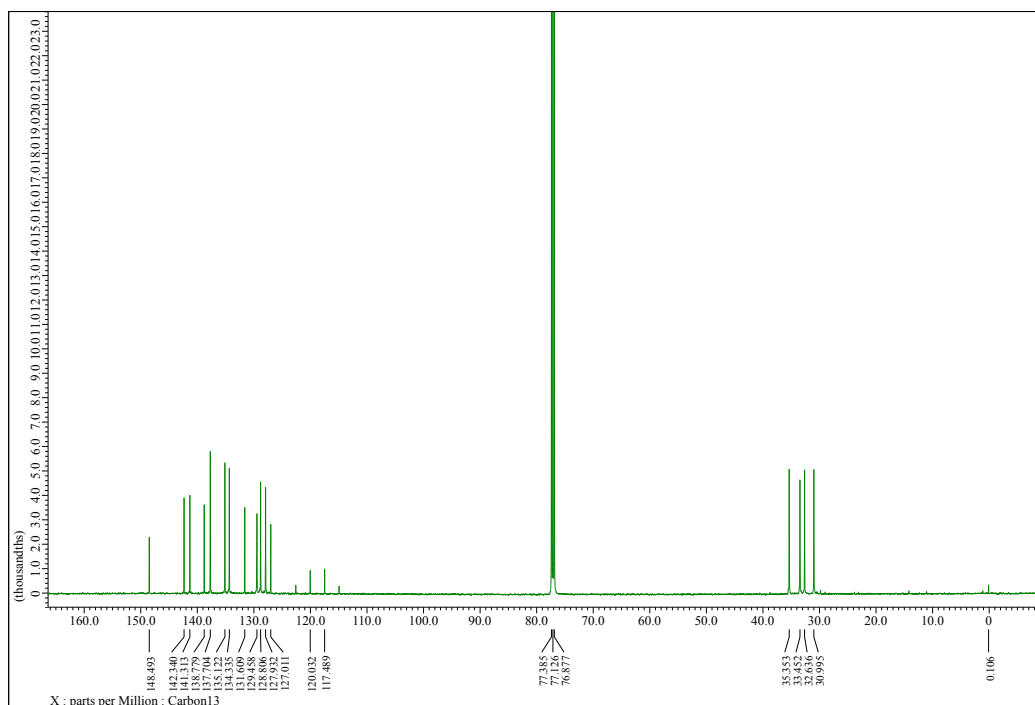

**Fig. S8.** (A)  $^1\text{H}$  NMR spectrum and (B)  $^{13}\text{C}\{^1\text{H}\}$  NMR spectrum of  $(R_p)\text{-5}$  in  $\text{CDCl}_3$ .

(A)

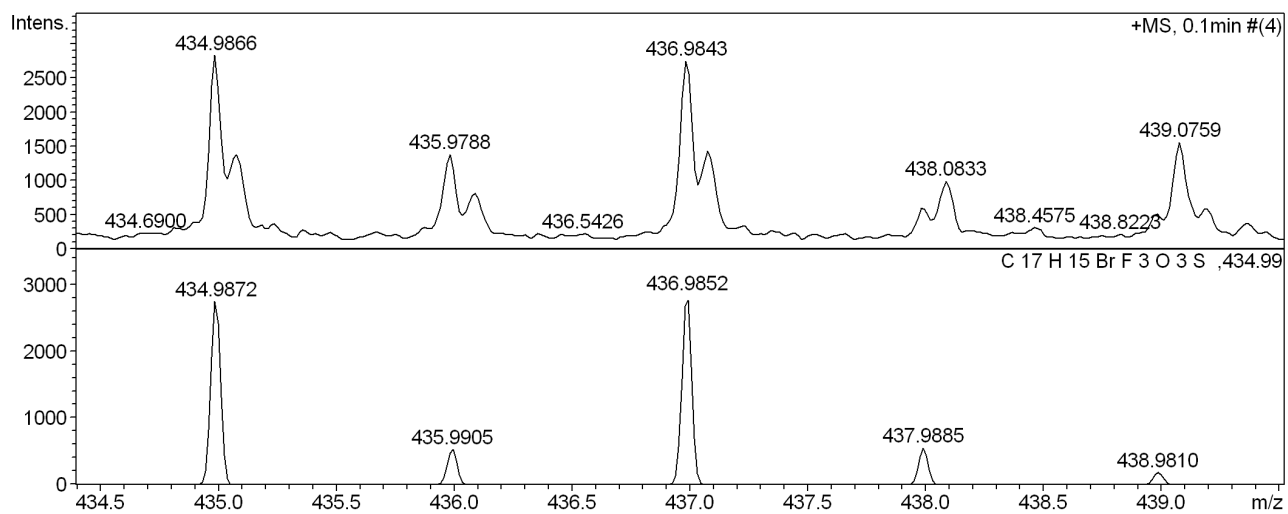

(B)

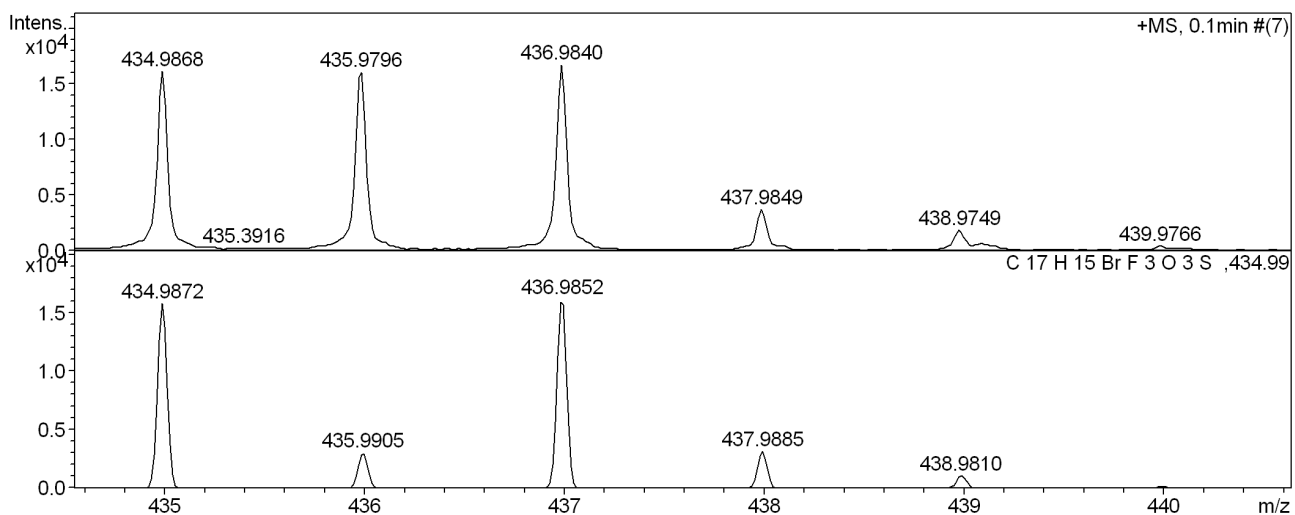

**Fig. S9.** Mass spectra of (A)  $(R_p)$ -5 and  $(S_p)$ -5; upper and lower spectra show observed and calculated spectra, respectively.

## Synthesis of (*S<sub>p</sub>*)-7

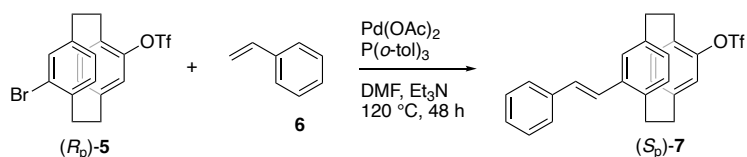

A mixture of (*R<sub>p</sub>*)-5 (1.75 g, 4.0 mmol), Pd(OAc)<sub>2</sub> (46.9 mg, 0.20 mmol) and P(*o*-tol)<sub>3</sub> (232.9 mg, 0.76 mmol) was placed in a round-bottom flask equipped with a magnetic stirring bar. After degassing the reaction mixture several times, DMF (12 mL), Et<sub>3</sub>N (62 mL) and styrene **6** (0.65 mL, 613.2 mg, 5.63 mmol) were added, and the reaction was carried out at 120 °C for 48 h with stirring. After the reaction mixture was cooled to room temperature, precipitates were removed by filtration. The organic layer was separated, and then aqueous layer was extracted with CH<sub>2</sub>Cl<sub>2</sub>. The organic layer was washed with H<sub>2</sub>O and brine, and dried over MgSO<sub>4</sub>. MgSO<sub>4</sub> was removed by filtration, and the solvent was removed with a rotary evaporator. The residue was purified by column chromatography on SiO<sub>2</sub> (CHCl<sub>3</sub>/hexane = 1/2 v/v as an eluent) to afford (*S<sub>p</sub>*)-7 (1.49 g, 4.03 mmol, 81%) as a yellow oil.

$R_f = 0.45$  (CHCl<sub>3</sub>/hexane = 1/2 v/v). <sup>1</sup>H NMR (CDCl<sub>3</sub>, 500 MHz) δ 2.82–3.21 (m, 6H), 3.39–3.48 (m, 1H), 3.60–3.69 (m, 1H), 6.21 (d,  $J = 1.7$  Hz, 1H), 6.47 (d,  $J = 8.0$  Hz, 1H), 6.52 (d,  $J = 8.0$  Hz, 1H), 6.65 (d,  $J = 1.7$  Hz, 1H), 6.78 (dd,  $J = 1.7, 1.7$  Hz, 1H), 6.85 (dd,  $J = 2.3, 1.7$  Hz, 1H), 6.90 (d,  $J = 16.0$  Hz, 1H), 7.18 (d,  $J = 16.0$  Hz, 1H), 7.31 (t,  $J = 7.5, 7.5$  Hz, 1H), 7.42 (t,  $J = 7.5, 8.0$  Hz, 2H), 7.57 (d,  $J = 6.9$  Hz, 2H) ppm; <sup>13</sup>C{<sup>1</sup>H} NMR (CDCl<sub>3</sub>, 125 MHz) δ 30.8, 33.3, 33.8, 33.9, 117.5, 120.1, 126.3, 126.5, 127.6, 127.8, 128.8, 128.9, 129.8, 130.2, 130.4, 131.8, 134.2, 134.6, 137.5, 137.6, 137.8, 139.5, 142.3, 148.3 ppm. HRMS (ESI<sup>+</sup>) calcd for C<sub>25</sub>H<sub>21</sub>BrF<sub>3</sub>O<sub>3</sub>S+Na<sup>+</sup>: 481.1056, found 481.1063.  $[\alpha]_D^{25} = -60.51$  ( $c$  0.11, CHCl<sub>3</sub>).

(*R<sub>p</sub>*)-7 was obtained in 80% yield by the same procedure of (*S<sub>p</sub>*)-7. HRMS (APCI) calcd. for C<sub>25</sub>H<sub>21</sub>BrF<sub>3</sub>O<sub>3</sub>S+H<sup>+</sup>: 459.1236, found 459.1227.  $[\alpha]_D^{25} = +60.37$  ( $c$  0.11, CHCl<sub>3</sub>).

(A)

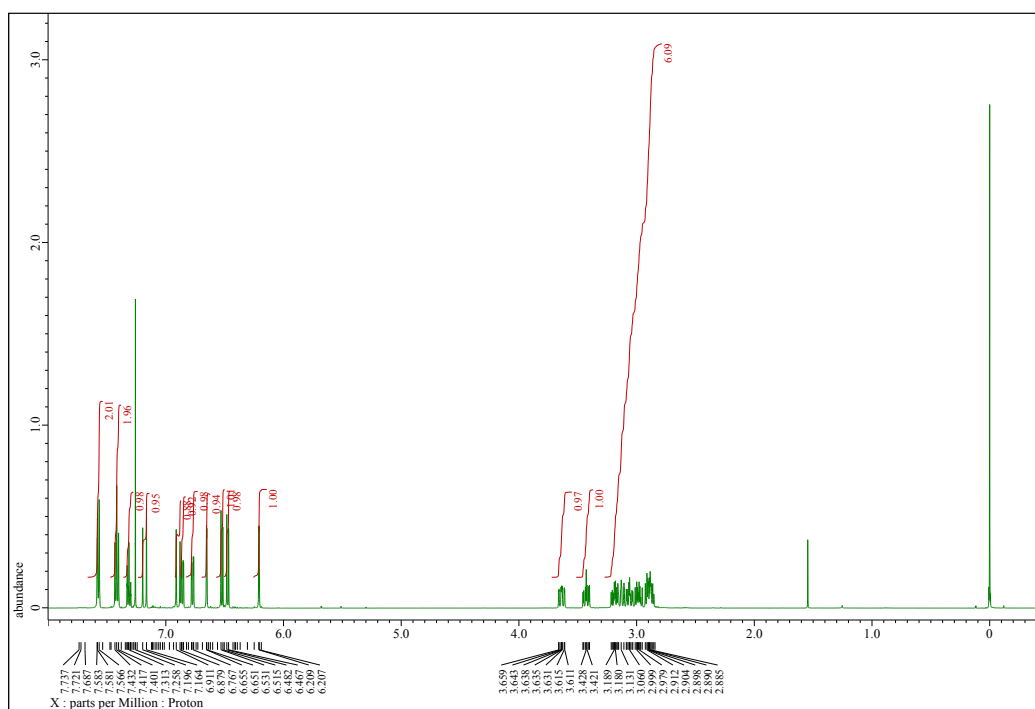

(B)

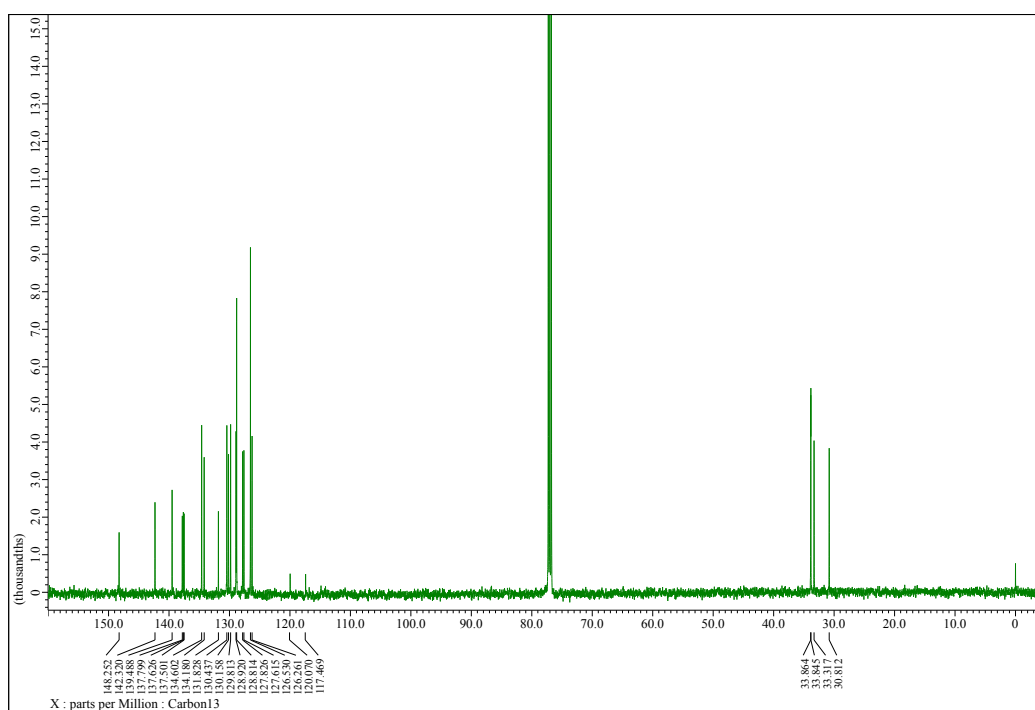

Fig. S10. (A)  $^1\text{H}$  NMR spectrum and (B)  $^{13}\text{C}\{^1\text{H}\}$  NMR spectrum of ( $S_p$ )-7 in  $\text{CDCl}_3$ .

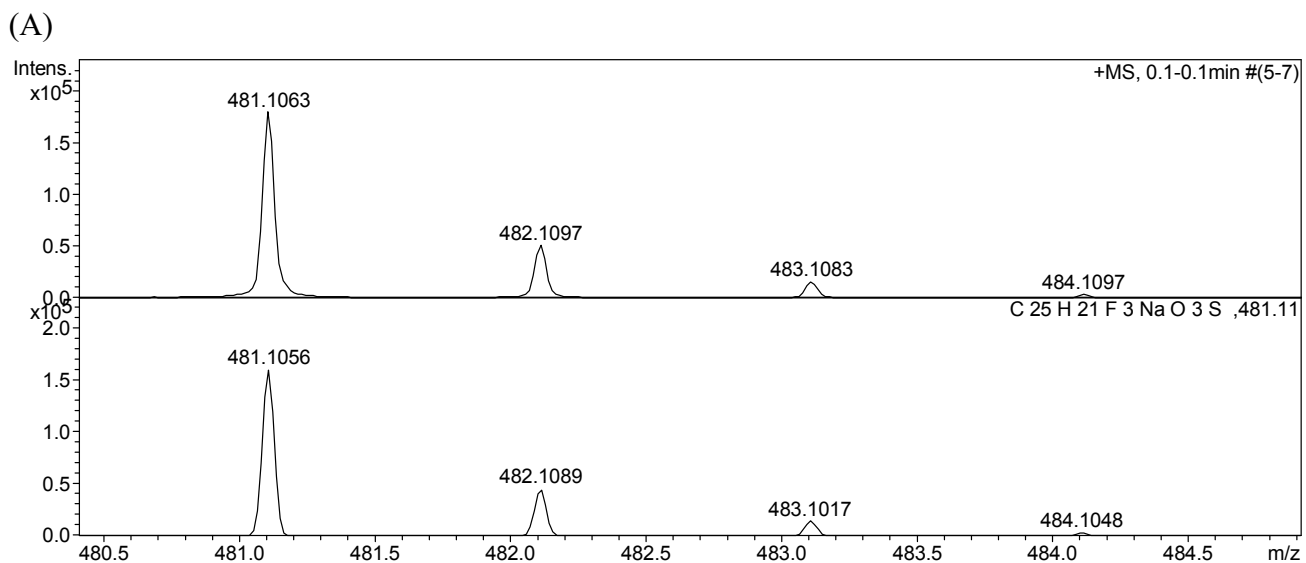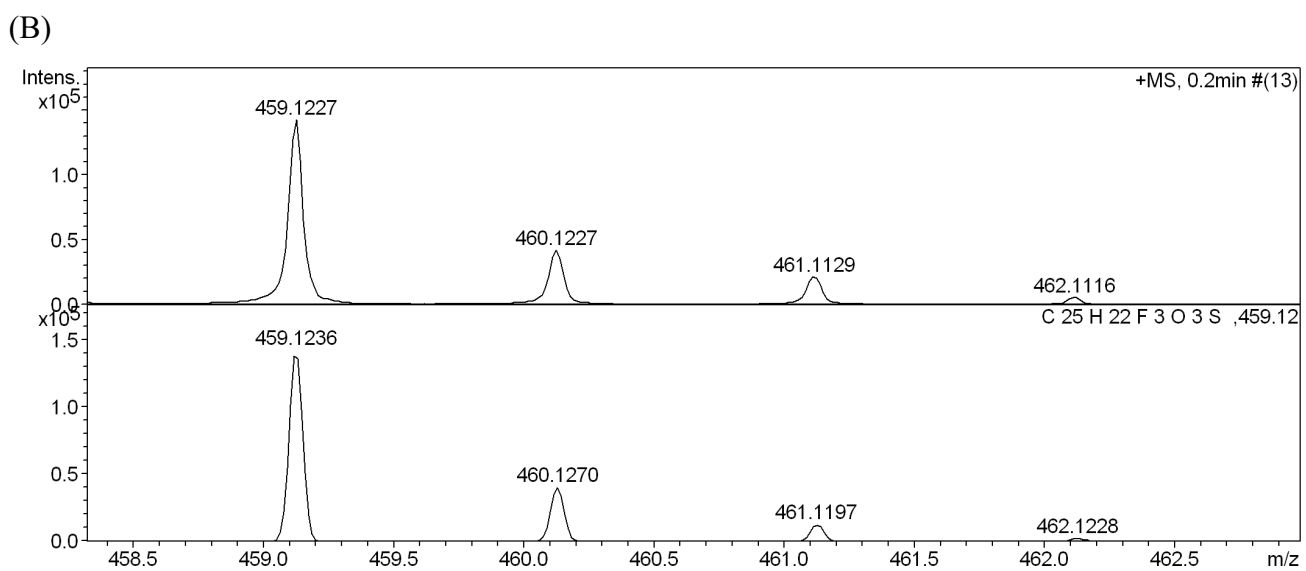

**Fig. S11.** Mass spectra of (A) (*S<sub>p</sub>*)-7 and (*R<sub>p</sub>*)-7; upper and lower spectra show observed and calculated spectra, respectively.

## Synthesis of (*S<sub>p</sub>*)-**9**

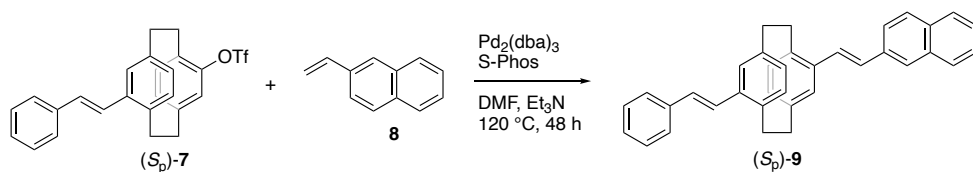

A mixture of (*S<sub>p</sub>*)-**7** (252.5 mg, 0.55 mmol),  $\text{Pd}_2(\text{dba})_3$  (51.0 mg, 0.056 mmol) and S-Phos (79.8 mg, 0.19 mmol) was placed in a round-bottom flask equipped with a magnetic stirring bar. After degassing the reaction mixture several times, DMF (81 mL),  $\text{Et}_3\text{N}$  (1.5 mL) and 2-vinylnaphthalene **8** (120.0 mg, 0.78 mmol) were added, and the reaction was carried out at  $120\text{ }^\circ\text{C}$  for 48 h with stirring. After the reaction mixture was cooled to room temperature, precipitates were removed by filtration. The organic layer was separated, and then aqueous layer was extracted with  $\text{CH}_2\text{Cl}_2$ . The organic layer was washed with  $\text{H}_2\text{O}$  and brine, and dried over  $\text{MgSO}_4$ .  $\text{MgSO}_4$  was removed by filtration, and the solvent was removed with a rotary evaporator. The residue was purified by column chromatography on  $\text{SiO}_2$  ( $\text{CHCl}_3/\text{hexane} = 1/2$  v/v as an eluent) and recrystallization from  $\text{CHCl}_3/\text{MeOH}$  (v/v = 1/1) to afford (*S<sub>p</sub>*)-**9** (154.5 mg, 0.33 mmol, 81%) as a light yellow solid.

$R_f = 0.40$  ( $\text{CHCl}_3/\text{hexane} = 1/2$  v/v).  $^1\text{H NMR}$  ( $\text{CDCl}_3$ , 500 MHz)  $\delta$  2.88–3.09 (m, 4H), 3.10–3.19 (m, 2H), 3.56–3.69 (m, 2H), 6.45 (t,  $J = 8.0, 5.7$  Hz, 2H), 6.66–6.77 (m, 4H), 6.90 (d,  $J = 16.0$  Hz, 1H), 7.06 (d,  $J = 16.0$  Hz, 1H), 7.23 (s, 1H), 7.31 (t,  $J = 7.5, 7.5$  Hz, 1H), 7.36 (d,  $J = 16.6$  Hz, 1H), 7.43 (t,  $J = 7.5, 7.5$  Hz, 2H), 7.46–7.54 (m, 2H), 7.60 (d,  $J = 7.5$  Hz, 2H), 7.81–7.91 (m, 4H), 7.92 (s, 1H) ppm;  $^{13}\text{C}\{^1\text{H}\}$  NMR ( $\text{CDCl}_3$ , 125 MHz)  $\delta$  33.4, 33.4, 34.5, 123.5, 125.9, 126.4, 126.5, 127.0, 127.3, 127.5, 127.7, 128.0, 128.4, 128.8, 129.3, 129.4, 129.5, 129.5, 130.1, 130.2, 133.6, 133.6, 139.5, 139.5 ppm. HRMS (APCI) calcd for  $\text{C}_{36}\text{H}_{30}+\text{H}^+$ : 463.2420, found 463.2410.  $[\alpha]_D^{25} = -91.24$  (c 0.20,  $\text{CHCl}_3$ ).

(*R<sub>p</sub>*)-**9** was obtained in 70% yield by the same procedure of (*S<sub>p</sub>*)-**9**. HRMS (APCI) calcd. for  $\text{C}_{36}\text{H}_{30}+\text{H}^+$ : 463.2420, found 463.2414.  $[\alpha]_D^{25} = +91.84$  (c 0.20,  $\text{CHCl}_3$ ).



(A)

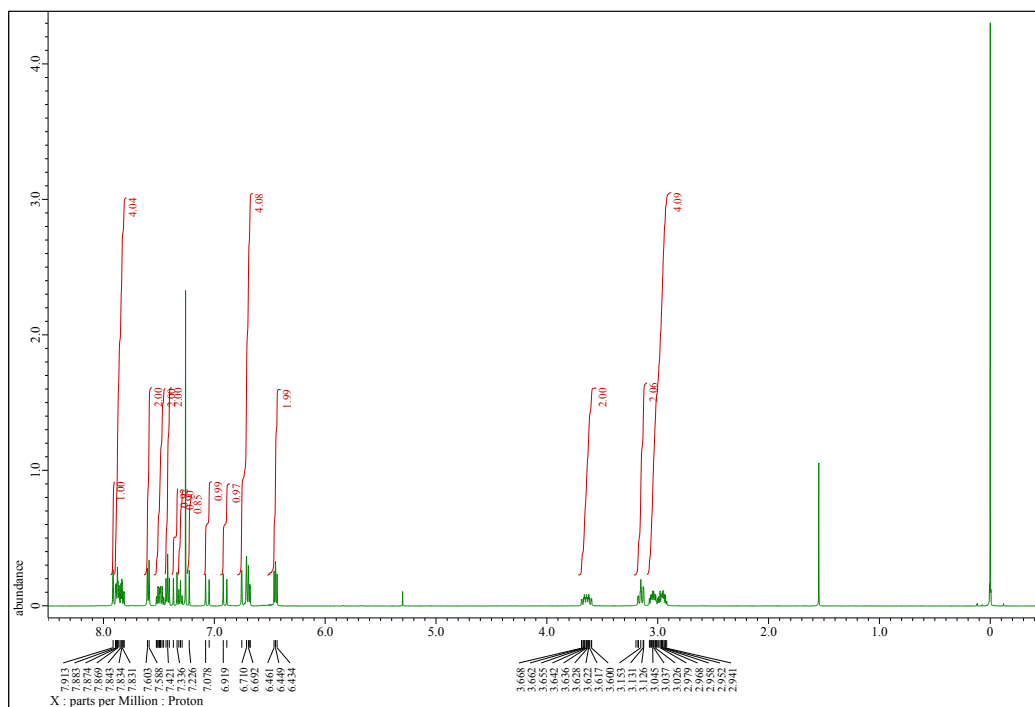

(B)

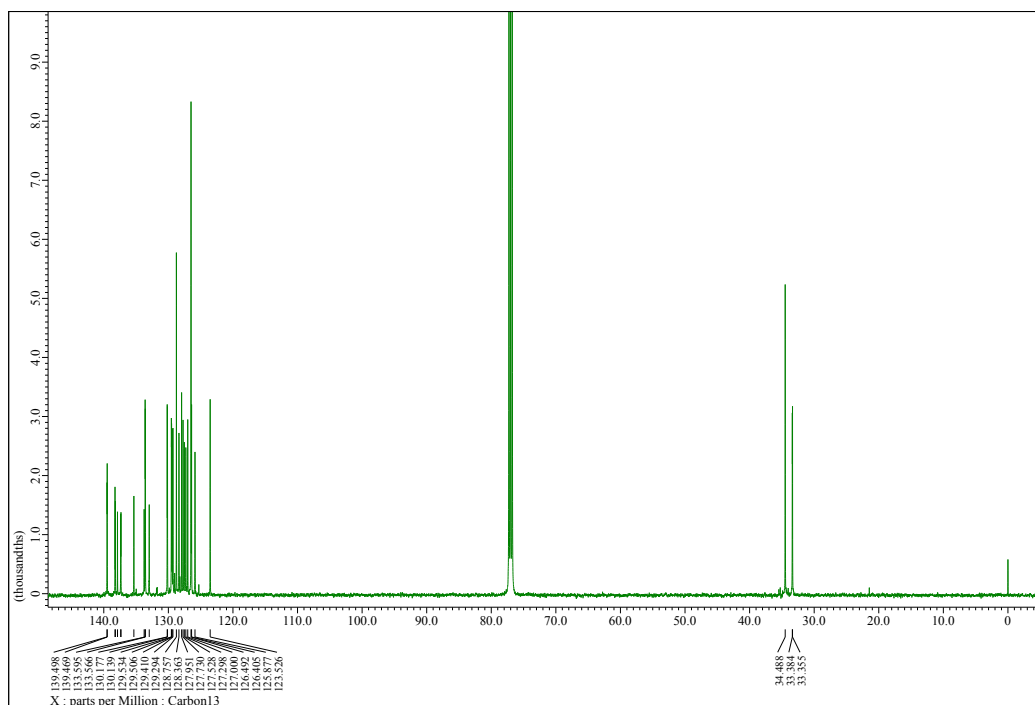

**Fig. S12.** (A)  $^1\text{H}$  NMR spectrum and (B)  $^{13}\text{C}\{^1\text{H}\}$  NMR spectrum of (*S<sub>p</sub>*)-**9** in  $\text{CDCl}_3$ .

(A)

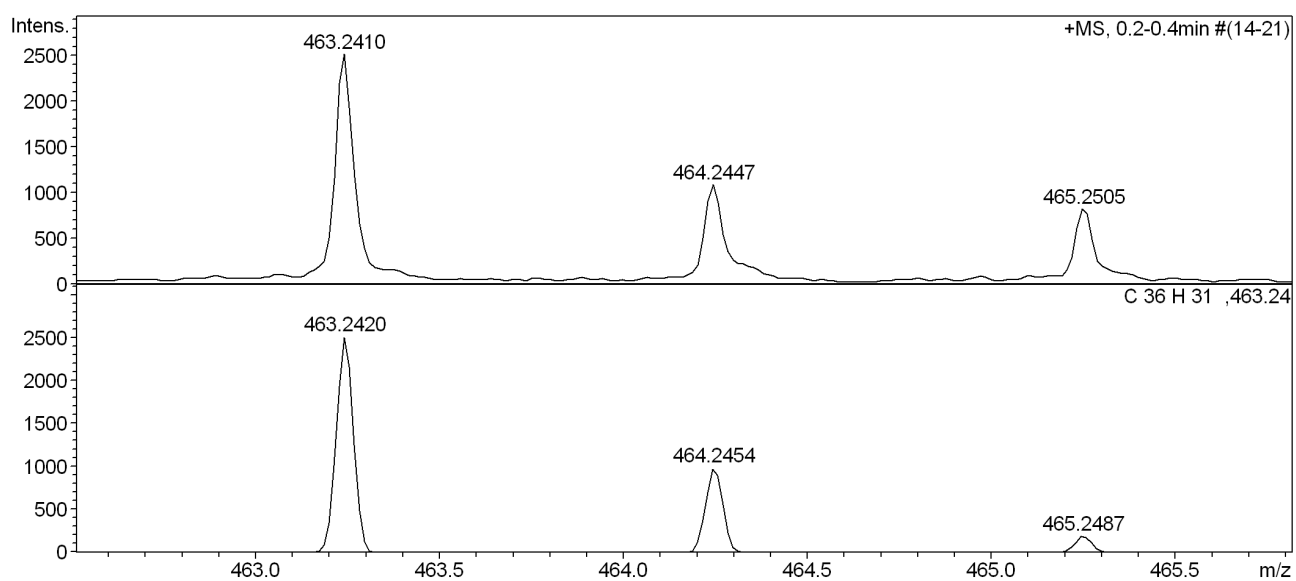

(B)

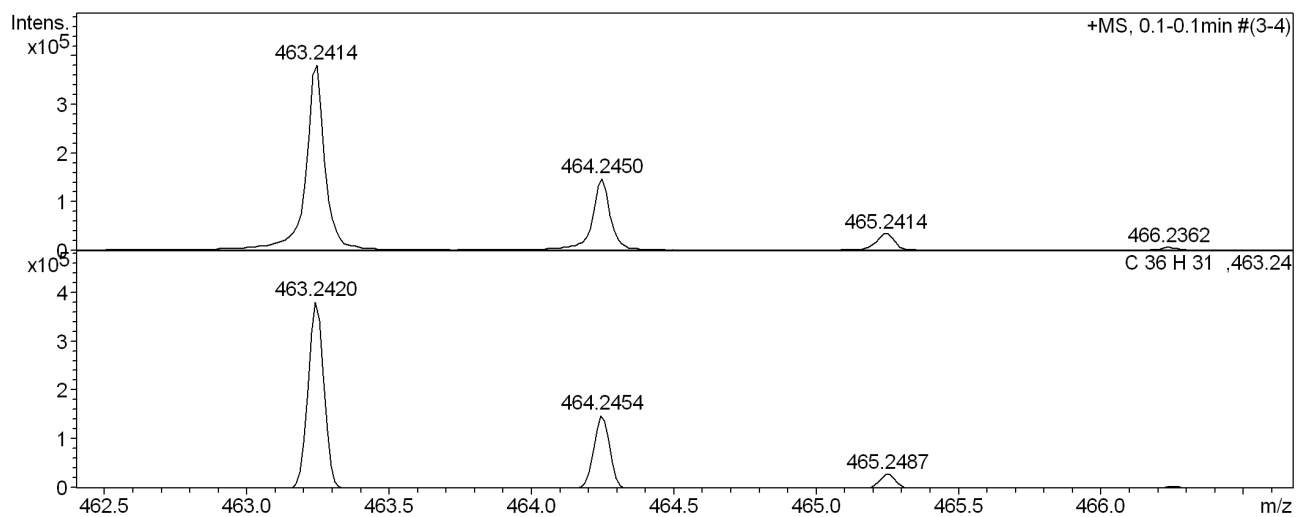

**Fig. S13.** Mass spectra of (A)  $(S_p)$ -**9** and  $(R_p)$ -**9**; upper and lower spectra show observed and calculated spectra, respectively.

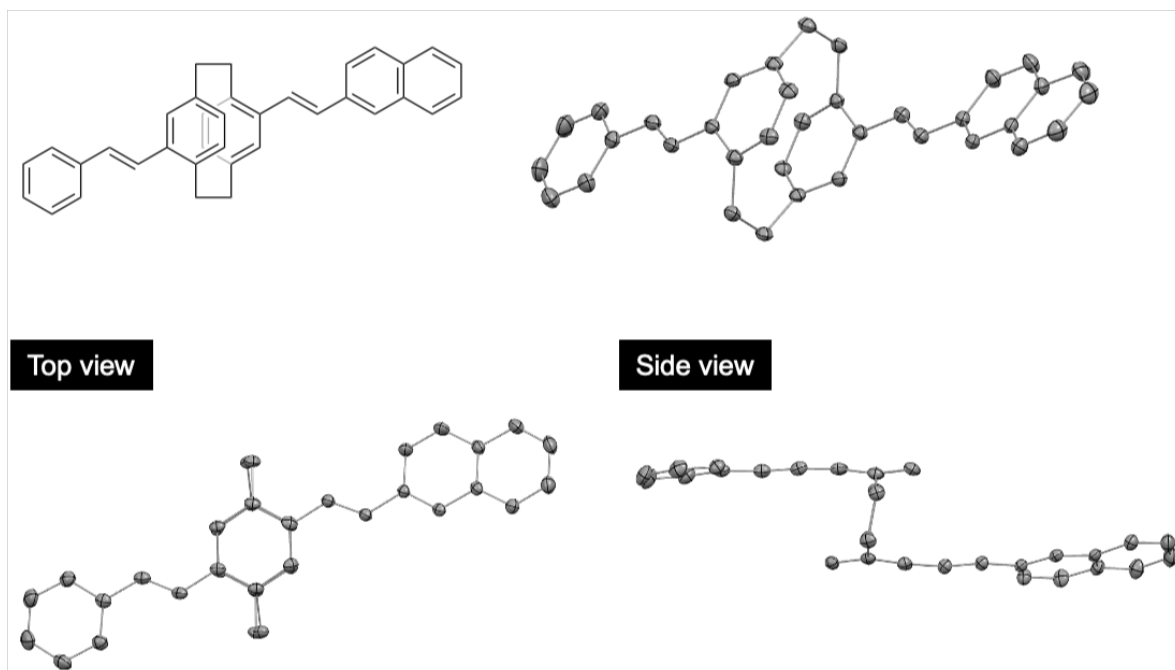

**Fig. S14.** ORTEP drawings of  $(S_p)$ -**9** (CCDC-2214408). Thermal ellipsoids are drawn at the 30% probability level. Hydrogen atoms are omitted for clarity.

**Table S3.** Crystallographic data for (*S*<sub>p</sub>)-**9**.

|                                                                            |                                 |
|----------------------------------------------------------------------------|---------------------------------|
| Formula                                                                    | C <sub>36</sub> H <sub>30</sub> |
| Formula weight                                                             | 462.639                         |
| Temperature (K)                                                            | 150                             |
| Crystal color, habit                                                       | clear, light yellow             |
| Crystal size, mm                                                           | 0.1×0.1×0.05                    |
| Crystal system                                                             | monoclinic                      |
| Space group                                                                | <i>P</i> 2 <sub>1</sub> (#4)    |
| <i>a</i> , Å                                                               | 11.7851(8)                      |
| <i>b</i> , Å                                                               | 8.4229(4)                       |
| <i>c</i> , Å                                                               | 14.0354(9)                      |
| $\alpha$ , deg                                                             | 90                              |
| $\beta$ , deg                                                              | 113.748(8)                      |
| $\gamma$ , deg                                                             | 90                              |
| <i>V</i> , Å <sup>3</sup>                                                  | 1275.25(15)                     |
| <i>Z</i> value                                                             | 2                               |
| <i>D</i> <sub>calcd</sub> , g cm <sup>-3</sup>                             | 1.205                           |
| $\mu$ (MoK $\alpha$ ), cm <sup>-1</sup>                                    | 0.68                            |
| <i>F</i> (000)                                                             | 492.248                         |
| 2 $\theta$ <sub>max</sub> , deg                                            | 62.26                           |
| No. of reflections measured                                                | 12303                           |
| No. of observed reflections                                                | 6459                            |
| No. of variables                                                           | 325                             |
| <i>R</i> <sub>1</sub> ( <i>I</i> > 2 $\sigma$ ( <i>I</i> )) <sup>[a]</sup> | 0.0577(4855)                    |
| w <i>R</i> <sub>2</sub> (all reflns) <sup>[b]</sup>                        | 0.1757(6459)                    |
| Goodness of fit                                                            | 1.0511                          |
| Flack Parameter                                                            | 3(3)                            |

[a]  $R_1 = \Sigma(|F_o| - |F_c|) / \Sigma(|F_o|)$ . [b]  $wR_2 = [\Sigma[w(F_o^2 - F_c^2)^2] / \Sigma w(F_o^2)^2]^{1/2}$ .

Recrystallization solvent : chloroform/acetonitrile

## Synthesis of (*R<sub>p</sub>*)-**10**

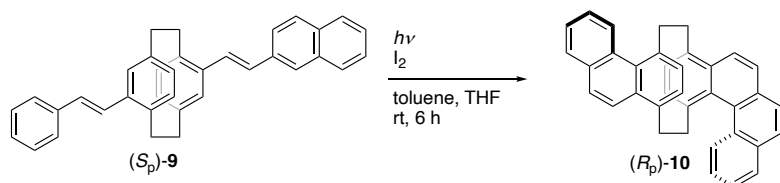

(*S<sub>p</sub>*)-**9** (50.5 mg, 0.11 mmol) was placed in a round-bottom flask equipped with a magnetic stirring. After toluene (94 mL), THF (2.0 mL), and  $I_2$  (6.81 mg, 0.05 mmol) were added, the mixture was irradiated with a UV lamp (LED  $\lambda = 365$  nm), and the reaction was carried out at room temperature for 6 h with stirring under air.  $H_2O$  and  $NaHSO_3$  were added in the reaction mixture. The organic layer was separated, and then aqueous layer was extracted with  $CH_2Cl_2$ . The organic layer was washed with  $H_2O$  and brine, and dried over  $MgSO_4$ .  $MgSO_4$  was removed by filtration, and the solvent was removed with a rotary evaporator. The residue was purified by recyclable HPLC ( $CH_2Cl_2$ ) and column chromatography on  $SiO_2$  ( $CHCl_3$ /hexane = 1/2 v/v as an eluent) to afford (*R<sub>p</sub>*)-**10** (2.5 mg, 0.0054 mmol, 5%) as a white solid.

$R_f = 0.30$  ( $CHCl_3$ /hexane = 1/2 v/v).  $^1H$  NMR ( $CDCl_3$ , 500 MHz):  $\delta$  1.91–1.99 (m, 1H), 2.86–2.90 (m, 1H), 3.27–3.29 (m, 2H), 3.48–3.51 (m, 1H), 3.69–3.73 (m, 2H), 4.62–4.66 (m, 1H), 5.25 (d,  $J = 6.9$  Hz, 1H), 5.60 (d,  $J = 6.9$  Hz, 1H), 6.42 (dd,  $J = 6.9, 6.9$  Hz, 2H), 7.54–7.63 (m, 5H), 7.75 (d,  $J = 8.6$  Hz, 1H), 7.87 (d,  $J = 8.0$  Hz, 1H), 7.90–7.97 (m, 4H), 8.01 (dd,  $J = 1.7, 1.2$  Hz, 1H), 8.57 (d,  $J = 8.0$  Hz, 1H), 8.80–8.81 (m, 1H) ppm;  $^{13}C\{^1H\}$  NMR ( $CDCl_3$ , 125 MHz):  $\delta$  32.0, 32.1, 37.7, 38.4, 124.1, 124.5, 125.5, 125.7, 125.8, 126.0, 126.5, 126.5, 127.1, 127.2, 127.7, 127.9, 128.4, 128.6, 128.8, 129.3, 129.7, 130.5, 130.5, 131.2, 131.4, 132.1, 132.5, 132.5, 133.4, 134.2, 134.4, 135.4, 136.0, 136.6 ppm. HRMS (APCI):  $m/z$  calcd for  $C_{36}H_{26}+H^+$ : 459.2107; found: 459.2092.  $[\alpha]_D^{25} = +304.43$  ( $c$  0.060,  $CHCl_3$ ).

(*S<sub>p</sub>*)-**10** was obtained in 6% yield by the same procedure of (*R<sub>p</sub>*)-**10**. HRMS (APCI) calcd. for  $C_{36}H_{26}+H^+$ : 459.2107, found 459.2114.  $[\alpha]_D^{25} = -304.23$  ( $c$  0.060,  $CHCl_3$ ).

(A)

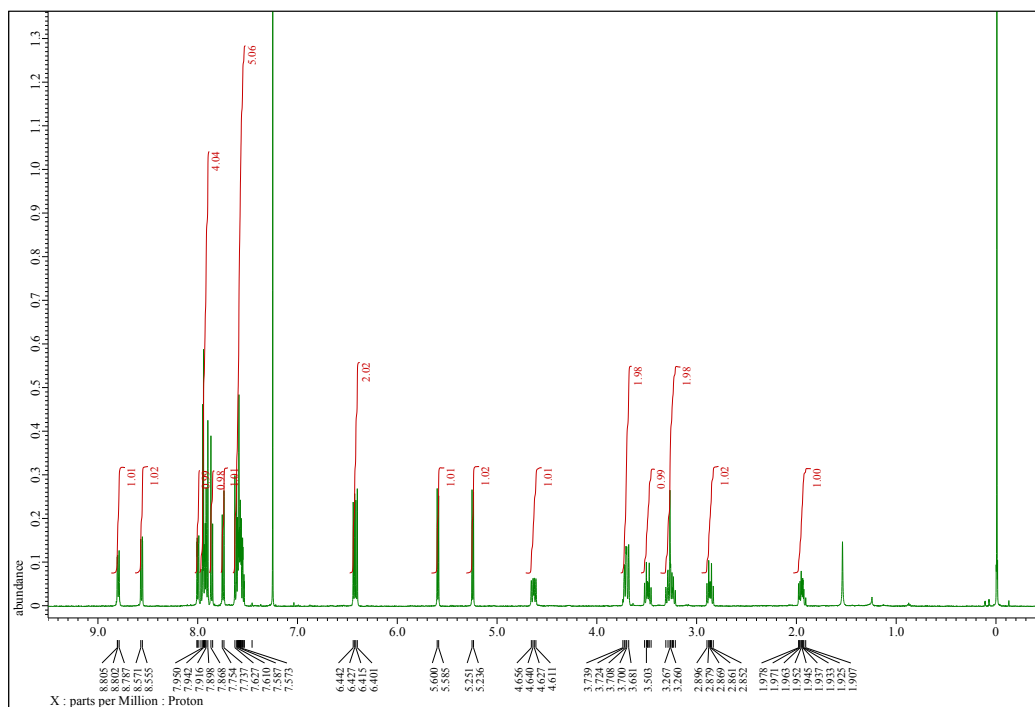

(B)

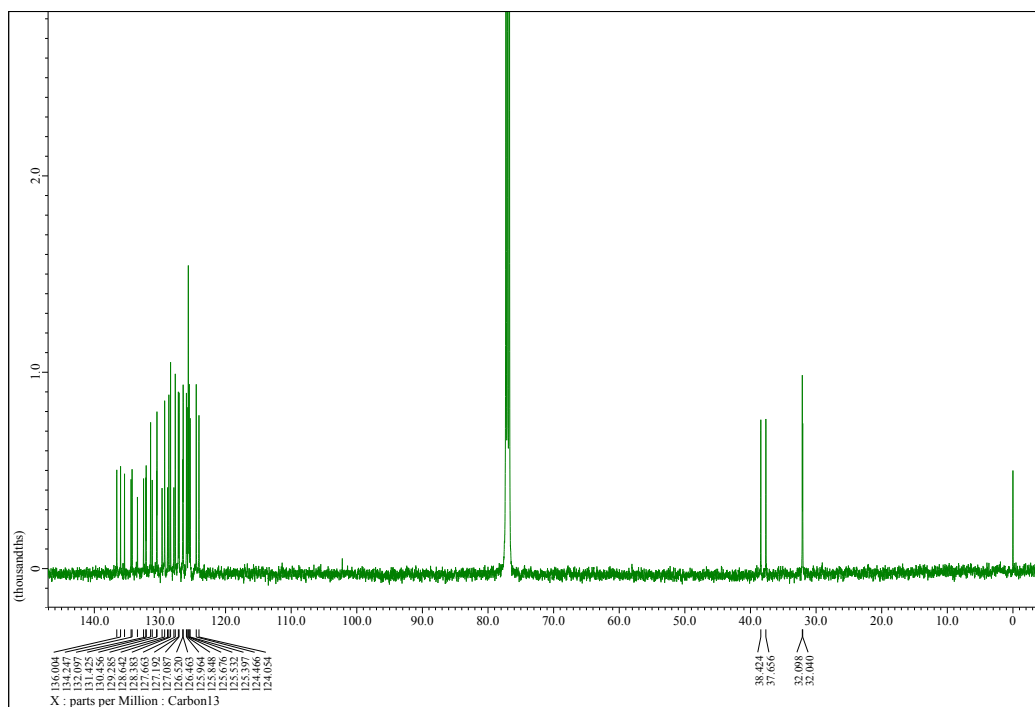

Fig. S15. (A)  $^1\text{H}$  NMR spectrum and (B)  $^{13}\text{C}\{^1\text{H}\}$  NMR spectrum of ( $S_p$ )-**10** in  $\text{CDCl}_3$ .

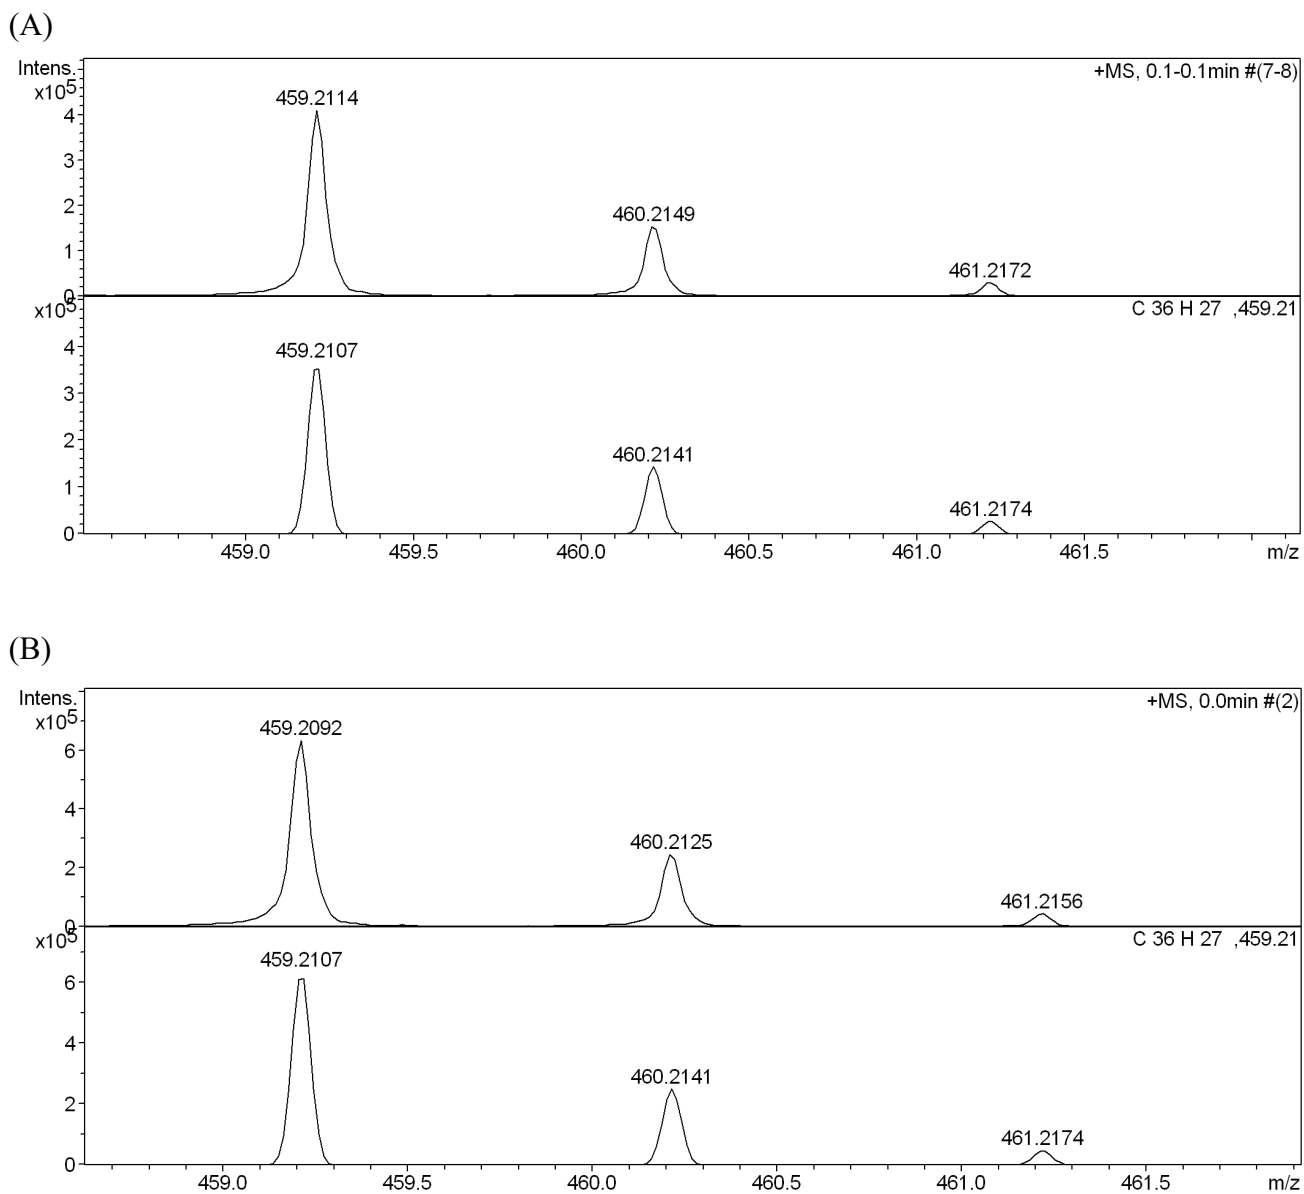

**Fig. S16.** Mass spectra of (A) (*S<sub>p</sub>*)-**10** and (*R<sub>p</sub>*)-**10**; upper and lower spectra show observed and calculated spectra, respectively.

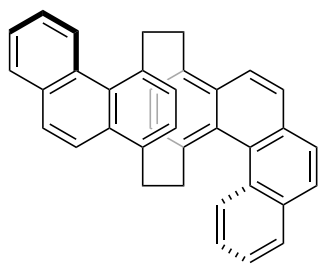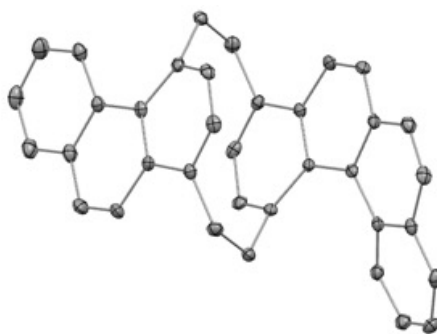

Top view

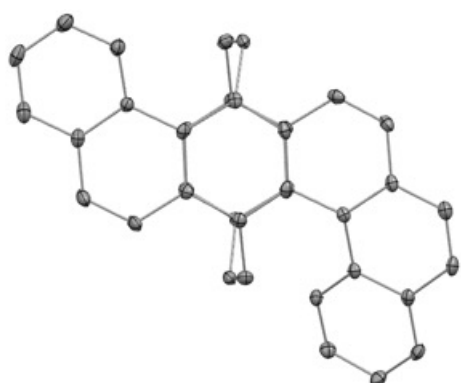

Side view

**Fig. S17.** ORTEP drawings of (*R<sub>p</sub>*)-**10** (CCDC-2214409). Thermal ellipsoids are drawn at the 30% probability level. Hydrogen atoms are omitted for clarity.



**Table S4.** Crystallographic data for (*R<sub>p</sub>*)-**10**.

|                                                                            |                                 |
|----------------------------------------------------------------------------|---------------------------------|
| Formula                                                                    | C <sub>36</sub> H <sub>26</sub> |
| Formula weight                                                             | 458.57                          |
| Temperature (K)                                                            | 150                             |
| Crystal color, habit                                                       | clear, colourless, needle       |
| Crystal size, mm                                                           | 0.2 × 0.1 × 0.05                |
| Crystal system                                                             | monoclinic                      |
| Space group                                                                | <i>P</i> 2 <sub>1</sub> (#4)    |
| <i>a</i> , Å                                                               | 10.4112(8)                      |
| <i>b</i> , Å                                                               | 8.1076(7)                       |
| <i>c</i> , Å                                                               | 14.6075(11)                     |
| $\alpha$ , deg                                                             | 90                              |
| $\beta$ , deg                                                              | 102.802(8)                      |
| $\gamma$ , deg                                                             | 90                              |
| <i>V</i> , Å <sup>3</sup>                                                  | 1202.37(17)                     |
| <i>Z</i> value                                                             | 2                               |
| <i>D</i> <sub>calcd</sub> , g cm <sup>-3</sup>                             | 1.267                           |
| $\mu$ (MoK $\alpha$ ), cm <sup>-1</sup>                                    | 0.72                            |
| <i>F</i> (000)                                                             | 484                             |
| 2 $\theta$ <sub>max</sub> , deg                                            | 62.398                          |
| No. of reflections measured                                                | 11308                           |
| No. of observed reflections                                                | 6766                            |
| No. of variables                                                           | 325                             |
| <i>R</i> <sub>1</sub> ( <i>I</i> > 2 $\sigma$ ( <i>I</i> )) <sup>[a]</sup> | 0.0747(4037)                    |
| w <i>R</i> <sub>2</sub> (all reflns) <sup>[b]</sup>                        | 0.2091(6766)                    |
| Goodness of fit                                                            | 0.919                           |
| Flack Parameter                                                            | 4.7(10)                         |

[a]  $R_1 = \Sigma(|F_o| - |F_c|) / \Sigma(|F_o|)$ . [b]  $wR_2 = [\Sigma[w(F_o^2 - F_c^2)^2] / \Sigma w(F_o^2)^2]^{1/2}$ .

Recrystallization solvent : chloroform / acetonitrile

## Synthesis of (*S<sub>p</sub>*)-**12**

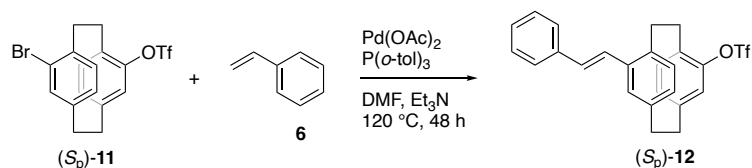

A mixture of (*S<sub>p</sub>*)-**11** (534.1mg, 1.227 mmol), Pd(OAc)<sub>2</sub> (27.6 mg, 0.123 mmol) and P(*o*-tol)<sub>3</sub> (131.0mg, 0.430 mmol) was placed in a round-bottom flask equipped with a magnetic stirring bar. After degassing the reaction mixture several times, DMF (18.7 mL), Et<sub>3</sub>N (4 mL) and styrene **6** (0.183 mL, 166.1 mg, 1.6 mmol) were added, and the reaction was carried out at 120 °C for 48 h with stirring. After the reaction mixture was cooled to room temperature, precipitates were removed by filtration. The organic layer was separated, and then aqueous layer was extracted with CH<sub>2</sub>Cl<sub>2</sub>. The organic layer was washed with H<sub>2</sub>O and brine, and dried over MgSO<sub>4</sub>. MgSO<sub>4</sub> was removed by filtration, and the solvent was removed with a rotary evaporator. The residue was purified by column chromatography on SiO<sub>2</sub> (CHCl<sub>3</sub>/hexane = 1/6 v/v as an eluent) and recrystallization from CHCl<sub>3</sub>/MeOH (v/v = 1/1) to afford (*S<sub>p</sub>*)-**12** (433.6 mg, 0.946 mmol, 77%) as a white solid.

$R_f = 0.42$  (CH<sub>2</sub>Cl<sub>2</sub>/hexane = 1/2 v/v). <sup>1</sup>H NMR (CDCl<sub>3</sub>, 500 MHz) δ 2.73–2.81 (m, 1H), 2.98–3.19 (m, 5H), 3.37 (dd,  $J = 9.2, 4.6$  Hz, 1H), 3.54 (dd,  $J = 9.7, 4.0$  Hz, 1H), 6.24 (s, 1H), 6.48 (d,  $J = 8.0$  Hz, 1H), 6.53 (d,  $J = 8.0$  Hz, 1H), 6.73 (s, 1H), 6.82 (d,  $J = 8.0$  Hz, 1H), 6.89–6.93 (m, 2H), 7.11 (d,  $J = 16.0$  Hz 1H), 7.31 (t,  $J = 6.9$  Hz, 1H), 7.41 (dd,  $J = 8.0, 6.9$  Hz, 2H), 7.57 (d,  $J = 8.0$  Hz, 2H) ppm; <sup>13</sup>C{<sup>1</sup>H} NMR (CDCl<sub>3</sub>, 125 MHz) δ 31.4, 32.2, 34.5, 34.8, 126.0, 126.6, 127.3, 127.9, 128.8, 129.6, 129.9, 131.2, 131.5, 131.7, 132.4, 137.5, 138.1, 138.2, 139.4, 141.2, 142.9, 148.5 ppm. HRMS (APCI) calcd. for C<sub>25</sub>H<sub>21</sub>F<sub>3</sub>O<sub>3</sub>S+Na<sup>+</sup>: 481.1056, found 481.1068.  $[\alpha]_D^{25} = +295.13$  ( $c$  0.078, CHCl<sub>3</sub>).

(*R<sub>p</sub>*)-**12** was obtained in 12% yield by the same procedure of (*R<sub>p</sub>*)-**12**. HRMS (APCI) calcd. for C<sub>25</sub>H<sub>21</sub>F<sub>3</sub>O<sub>3</sub>S+Na<sup>+</sup>: 481.1056, found 481.1062.  $[\alpha]_D^{25} = -295.17$  ( $c$  0.102, CHCl<sub>3</sub>).

(A)

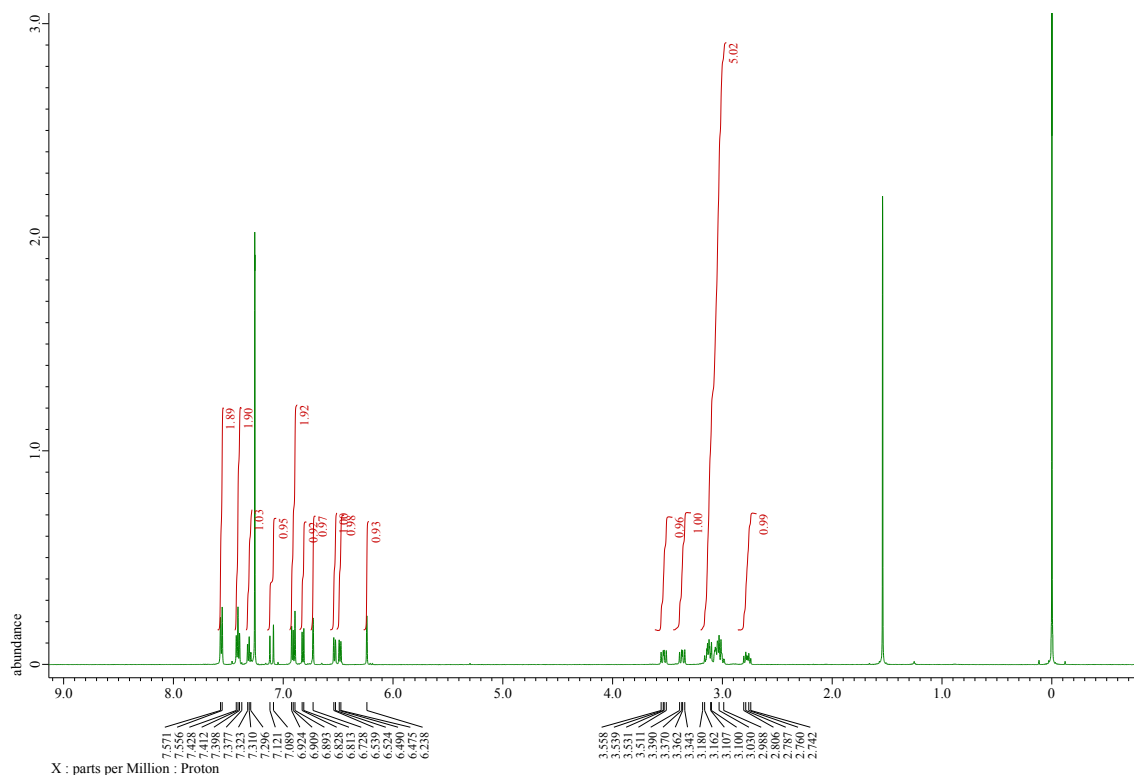

(B)

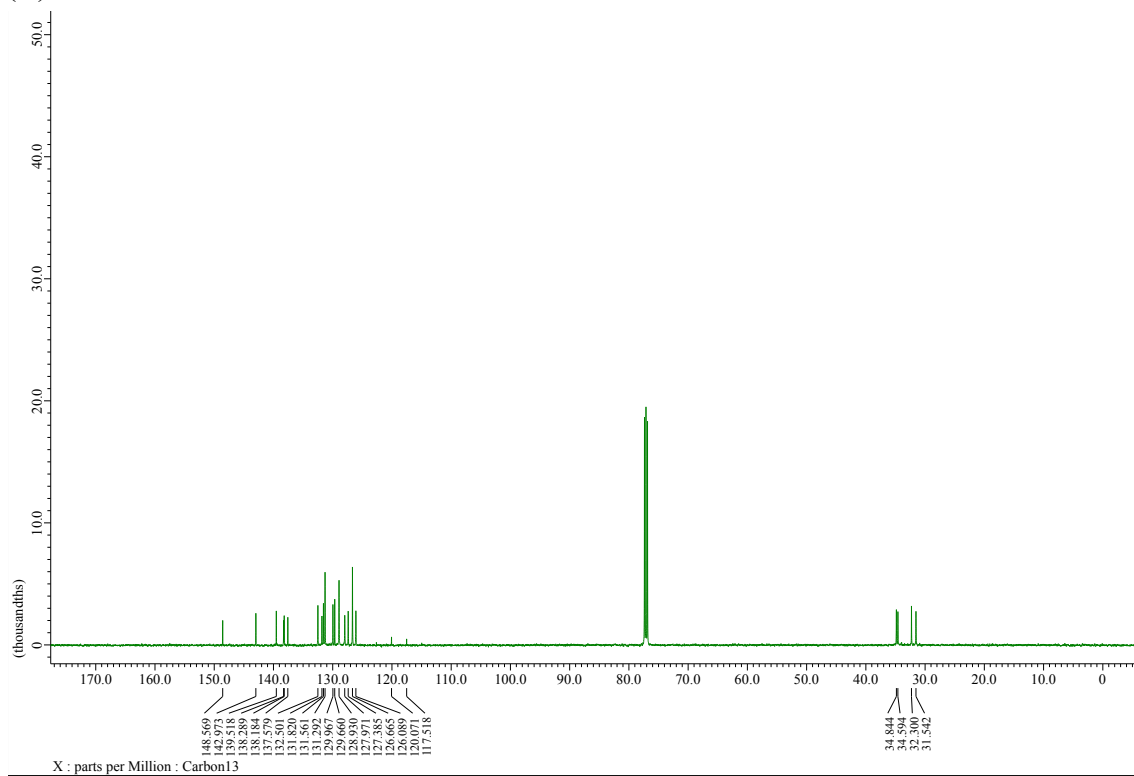

**Fig. S18.** (A)  $^1\text{H}$  NMR spectrum and (B)  $^{13}\text{C}\{^1\text{H}\}$  NMR spectrum of (*S<sub>p</sub>*)-**12** in  $\text{CDCl}_3$ .

(A)

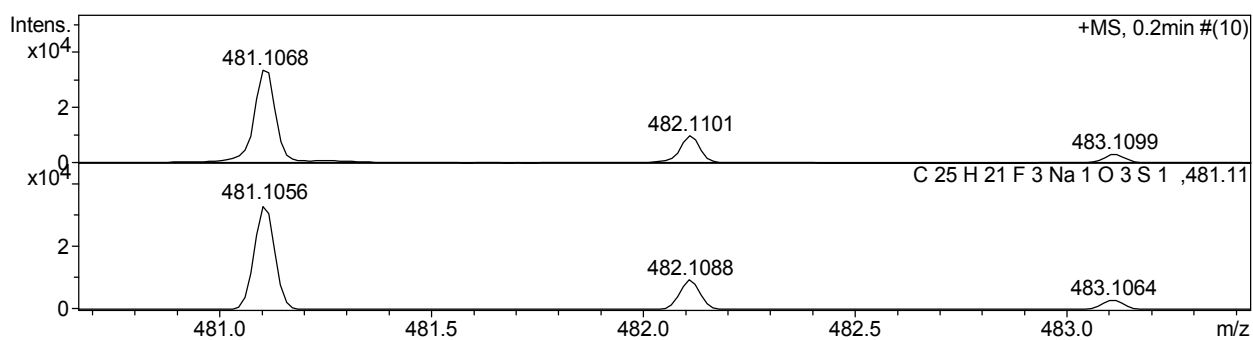

(B)

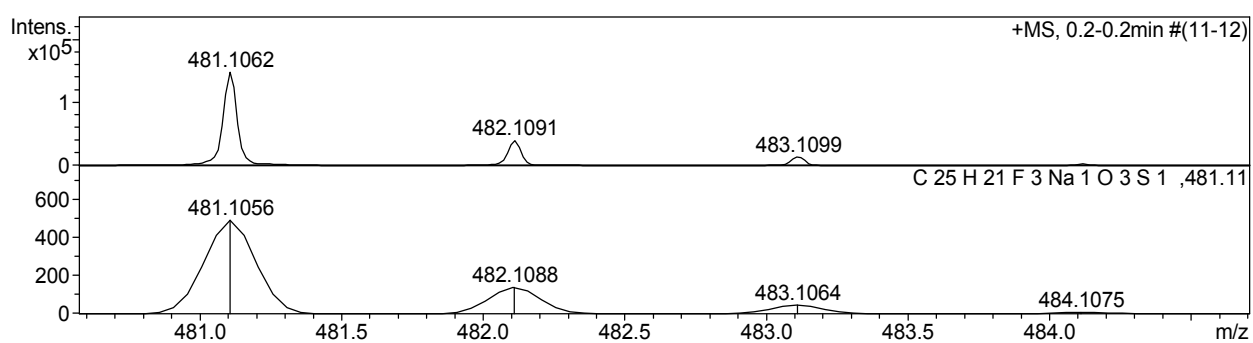

**Fig. S19.** Mass spectra of (A)  $(S_p)$ -12 and  $(R_p)$ -12; upper and lower spectra show observed and calculated spectra, respectively.

## Synthesis of (*S<sub>p</sub>*)-**13**

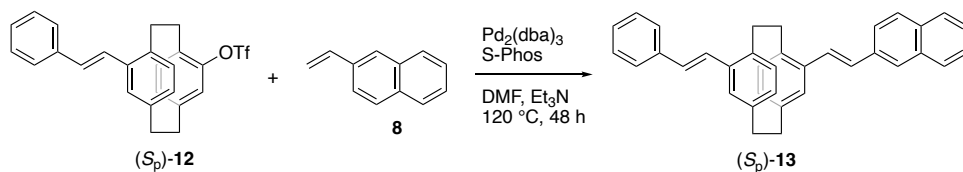

A mixture of (*S<sub>p</sub>*)-**12** (221.9 mg, 0.48 mmol),  $\text{Pd}(\text{OAc})_2$  (10.8 mg, 0.048 mmol) and S-Phos (69.0 mg, 0.17 mmol) was placed in a round-bottom flask equipped with a magnetic stirring bar. After degassing the reaction mixture several times, DMF (7.3 mL),  $\text{Et}_3\text{N}$  (1.6 mL) and 2-vinylnaphthalene (89.4 mg, 0.58 mmol) were added, and the reaction was carried out at  $120\text{ }^\circ\text{C}$  for 48 h with stirring. After the reaction mixture was cooled to room temperature, precipitates were removed by filtration. The organic layer was separated, and then aqueous layer was extracted with  $\text{CH}_2\text{Cl}_2$ . The organic layer was washed with  $\text{H}_2\text{O}$  and brine, and dried over  $\text{MgSO}_4$ .  $\text{MgSO}_4$  was removed by filtration, and the solvent was removed with a rotary evaporator. The residue was purified by column chromatography on  $\text{SiO}_2$  ( $\text{CHCl}_3/\text{hexane} = 1/3$  v/v as an eluent) and recrystallization from  $\text{CHCl}_3/\text{MeOH}$  (v/v = 1/1) to afford (*S<sub>p</sub>*)-**13** (78.7 mg, 0.17 mmol, 35%) as a light yellow solid.

$R_f = 0.31$  ( $\text{CH}_2\text{Cl}_2/\text{hexane} = 1/2$  v/v).  $^1\text{H NMR}$  ( $\text{CDCl}_3$ , 500 MHz)  $\delta$  2.86–2.93 (m, 2H), 2.99–3.06 (m, 2H), 3.15–3.20 (m, 2H), 3.53–3.63 (m, 2H), 6.45 (dd,  $J = 7.5$  Hz, 2H), 6.72–6.74 (m, 2H), 6.78 (s, 1H), 6.82 (s, 1H), 6.94 (d,  $J = 16.0$  Hz, 1H), 7.10 (d,  $J = 16.61$  Hz, 1H), 7.20 (d,  $J = 16.0$  Hz, 1H), 7.29–7.32 (m, 2H), 7.42 (dd,  $J = 7.5$  Hz, 2H), 7.45–7.52 (m, 2H), 7.59 (d,  $J = 8.0$  Hz, 2H), 7.81–7.88 (m, 4H), 7.91 (s, 1H) ppm;  $^{13}\text{C}\{^1\text{H}\}$  NMR ( $\text{CDCl}_3$ , 125 MHz)  $\delta$  33.5, 35.1, 123.5, 125.9, 126.4, 126.5, 126.7, 127.0, 127.6, 127.7, 128.0, 128.4, 128.8, 129.1, 129.2, 129.6, 130.9, 131.0, 131.2, 133.0, 133.8, 135.3, 137.8, 137.9, 138.1, 138.2, 139.7, 139.8 ppm. HRMS (APCI) calcd. for  $\text{C}_{36}\text{H}_{30}+\text{H}^+$ : 463.2420, found 463.2417.  $[\alpha]_D^{25} = +902.2$  (c 0.204,  $\text{CHCl}_3$ ).

(*R<sub>p</sub>*)-**13** was obtained in 34% yield by the same procedure of (*S<sub>p</sub>*)-**13**. HRMS (APCI) calcd. for  $\text{C}_{36}\text{H}_{30}+\text{H}^+$ : 463.2420, found 463.2420.  $[\alpha]_D^{25} = -902.4$  (c 0.126,  $\text{CHCl}_3$ ).

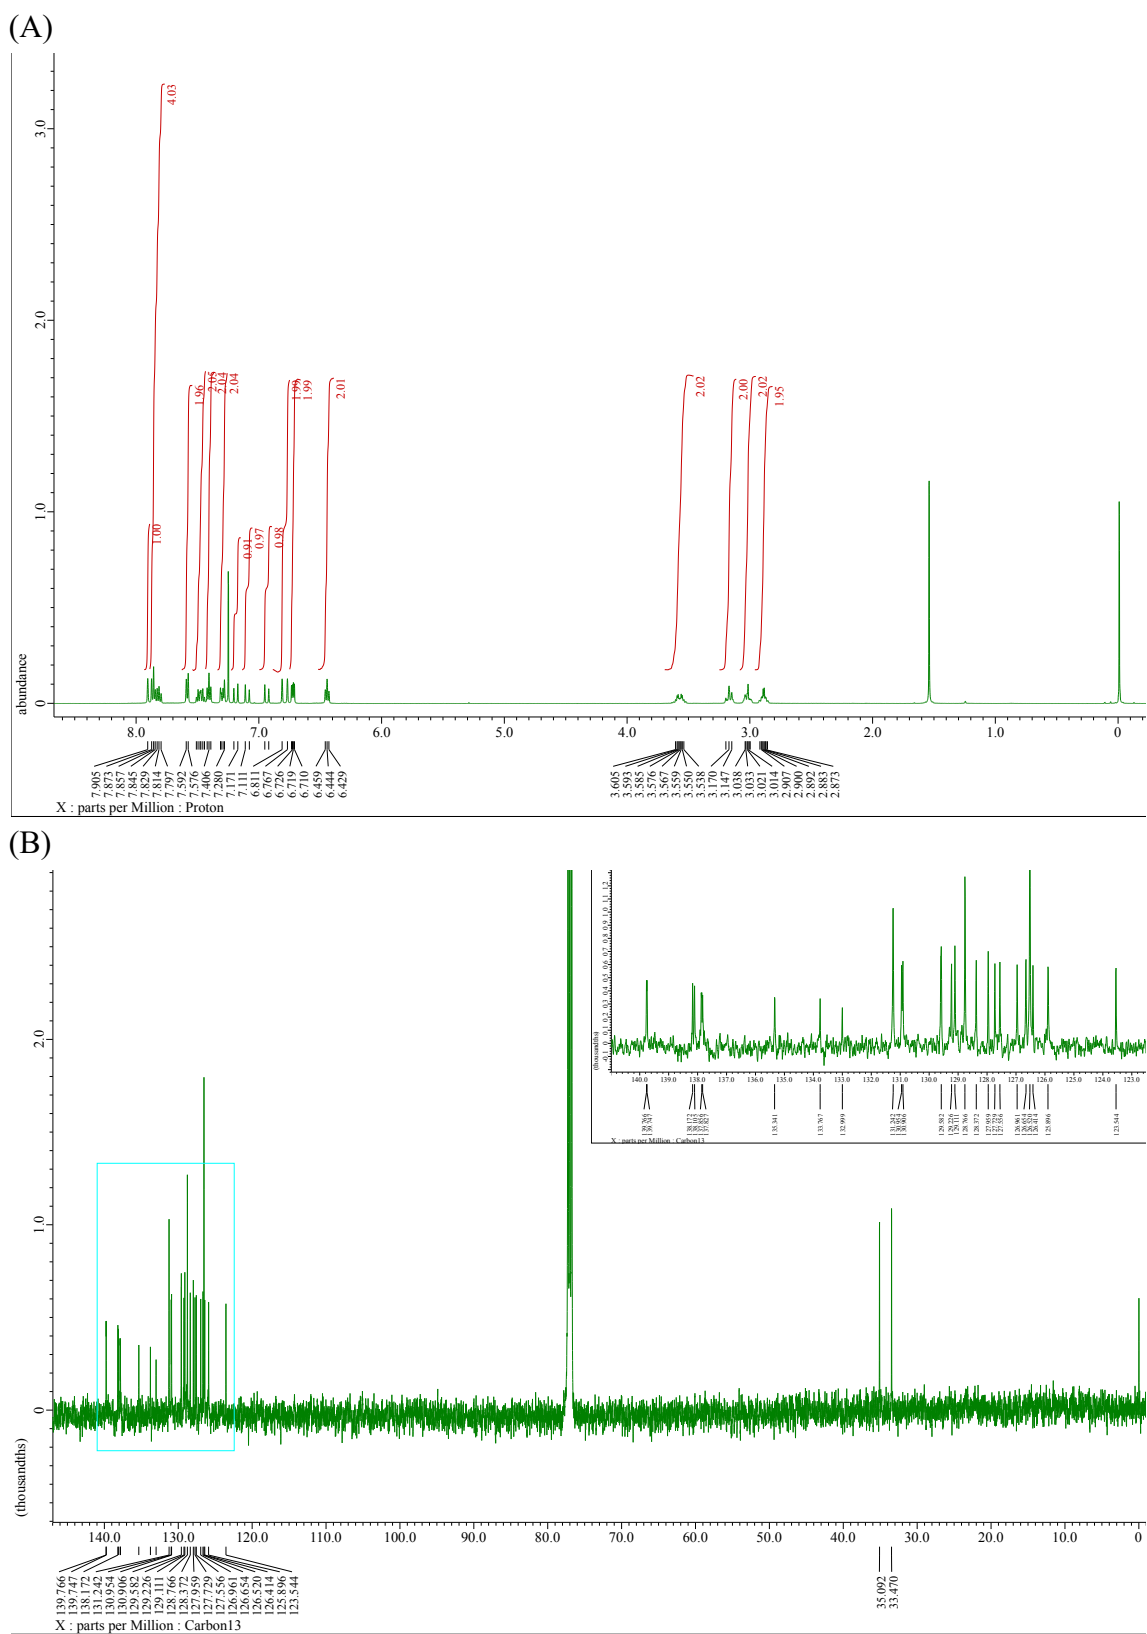

**Fig. S20.** (A)  $^1\text{H}$  NMR spectrum and (B)  $^{13}\text{C}\{^1\text{H}\}$  NMR spectrum of (*S<sub>p</sub>*)-**13** in  $\text{CDCl}_3$ .

(A)

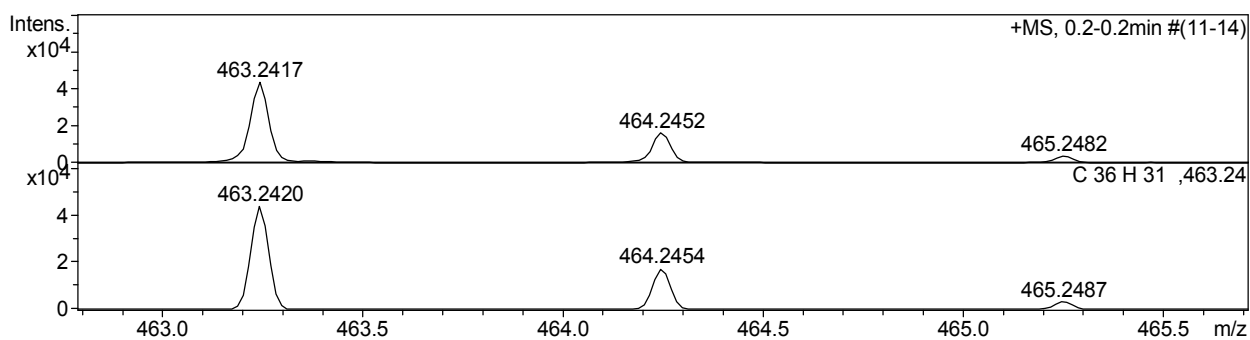

(B)

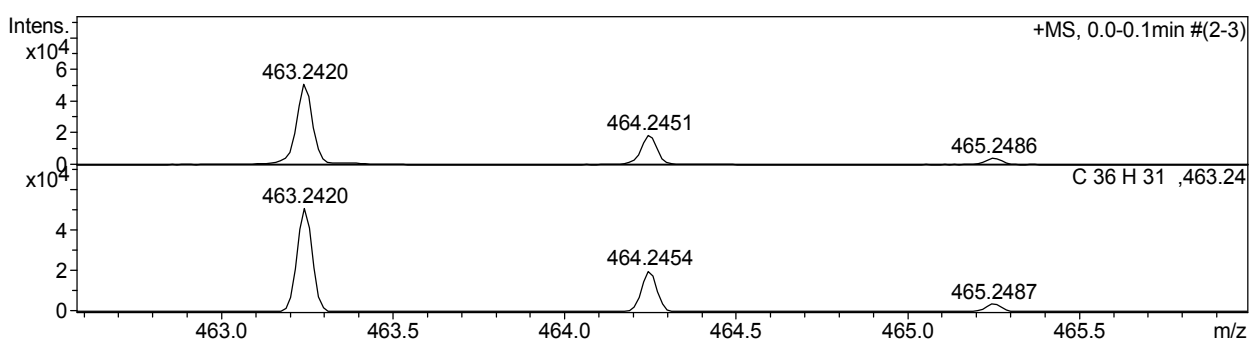

**Fig. S21.** Mass spectra of (A)  $(S_p)$ -13 and  $(R_p)$ -13; upper and lower spectra show observed and calculated spectra, respectively.

## Synthesis of (*R<sub>p</sub>*)-**14**

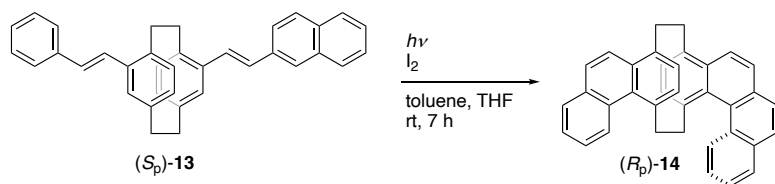

(*S<sub>p</sub>*)-**13** (78.7 mg, 0.17 mmol) was placed in a round-bottom flask equipped with a magnetic stirring bar. After toluene (170 mL), THF (6 mL) and I<sub>2</sub> (21.6 mg, 0.085 mmol) were added, the mixture was irradiated with a UV lamp (LED  $\lambda = 365$  nm), and the reaction was carried out at room temperature for 7 h with stirring. H<sub>2</sub>O and NaHSO<sub>3</sub> were added in the reaction mixture. The organic layer was separated, and then aqueous layer was extracted with CH<sub>2</sub>Cl<sub>2</sub>. The organic layer was washed with H<sub>2</sub>O and brine, and dried over MgSO<sub>4</sub>. MgSO<sub>4</sub> was removed by filtration, and the solvent was removed with a rotary evaporator. The residue was purified by recyclable HPLC (CH<sub>2</sub>Cl<sub>2</sub>) to afford (*R<sub>p</sub>*)-**14** (7.2 mg, 0.016 mmol, 9%) as a colorless solid.

$R_f = 0.39$  (CH<sub>2</sub>Cl<sub>2</sub>/hexane = 1/2 v/v). <sup>1</sup>H NMR (CDCl<sub>3</sub>, 500 MHz)  $\delta$  2.70–2.75 (m, 1H), 2.94–3.00 (m, 1H), 3.12–3.27 (m, 3H), 3.72–3.78 (m, 1H), 3.90–3.98 (m, 2H), 5.44 (d,  $J = 8.02$  Hz, 1H), 5.86 (d,  $J = 7.5$  Hz, 1H), 6.04 (d,  $J = 8.0$  Hz, 1H), 6.13 (d,  $J = 7.5$  Hz, 1H), 7.46–7.59 (m, 4H), 7.79 (d,  $J = 8.6$  Hz, 1H), 7.83 (d,  $J = 7.5$  Hz, 1H), 7.92–8.01 (m, 5H), 8.23 (d,  $J = 8.0$  Hz, 1H), 8.44 (d,  $J = 8.6$  Hz, 1H) ppm; <sup>13</sup>C{<sup>1</sup>H} NMR (CDCl<sub>3</sub>, 125 MHz)  $\delta$  32.6, 32.7, 36.6, 38.0, 123.4, 124.4, 125.2, 125.5, 125.6, 125.66, 125.73, 125.9, 126.5, 127.2, 127.5, 127.6, 128.1, 128.2, 128.4, 128.7, 128.8, 129.2, 129.5, 130.2, 130.3, 130.4, 130.5, 132.2, 132.3, 132.8, 133.0, 134.2, 134.4, 134.6, 136.0, 137.8 ppm. HRMS (APCI) calcd. for C<sub>36</sub>H<sub>26</sub>+H<sup>+</sup>: 459.2107, found 459.2100.  $[\alpha]^{25}_D = +508.4$  ( $c$  0.042, CHCl<sub>3</sub>).

(*S<sub>p</sub>*)-**14** was obtained in 10% yield by the same procedure of (*R<sub>p</sub>*)-**14**. HRMS (APCI) calcd. for C<sub>36</sub>H<sub>26</sub>+H<sup>+</sup>: 459.2107, found 459.2106.  $[\alpha]^{25}_D = -508.3$  ( $c$  0.02, CHCl<sub>3</sub>).



(A)

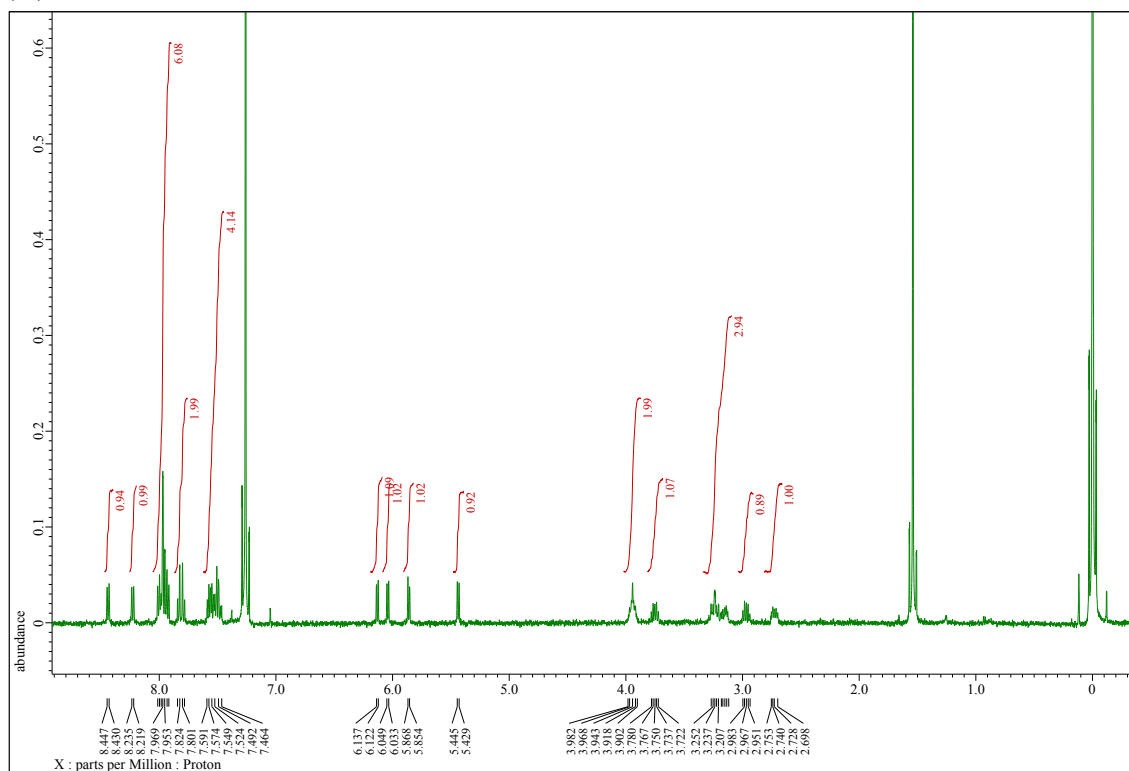

(B)

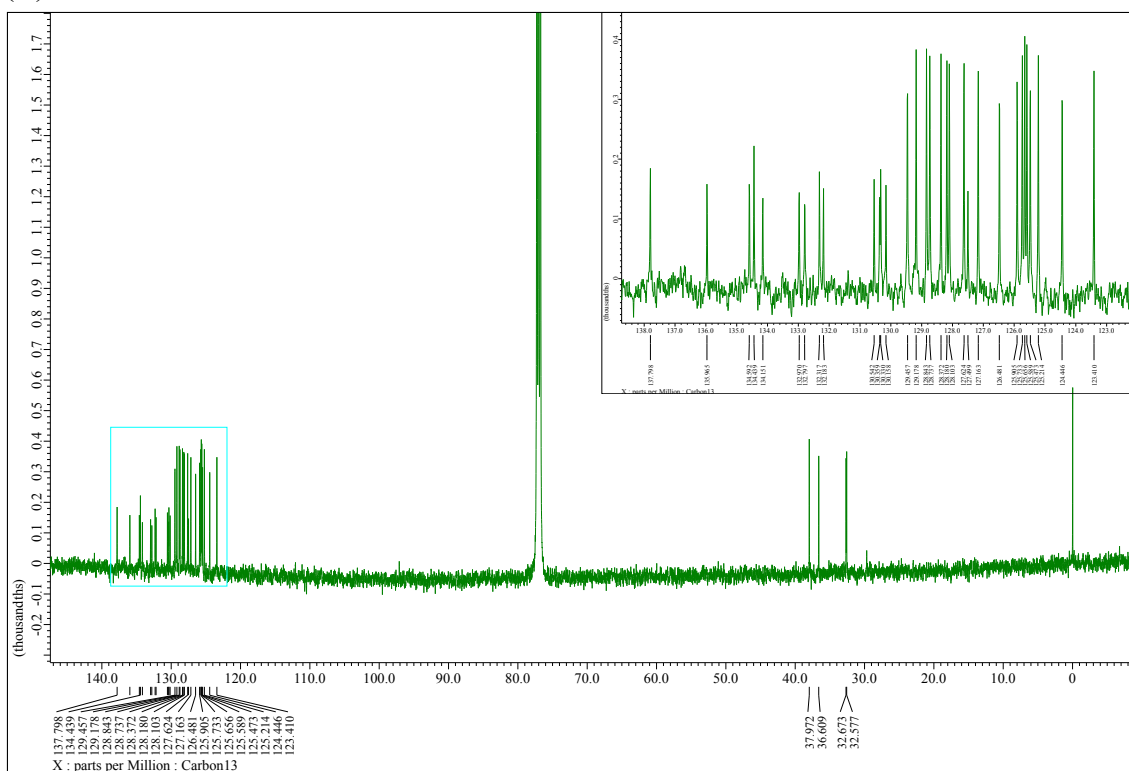

**Fig. S22.** (A)  $^1\text{H}$  NMR spectrum and (B)  $^{13}\text{C}\{^1\text{H}\}$  NMR spectrum of (*R<sub>p</sub>*)-14 in  $\text{CDCl}_3$ .

(A)

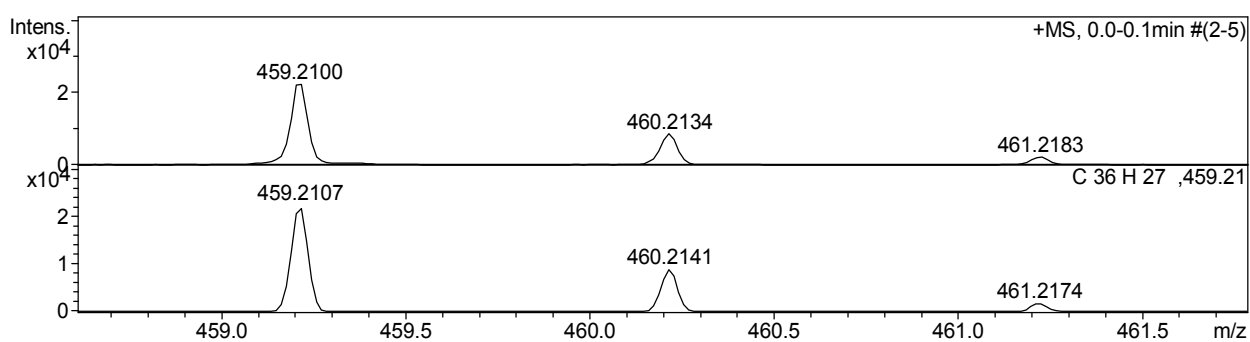

(B)

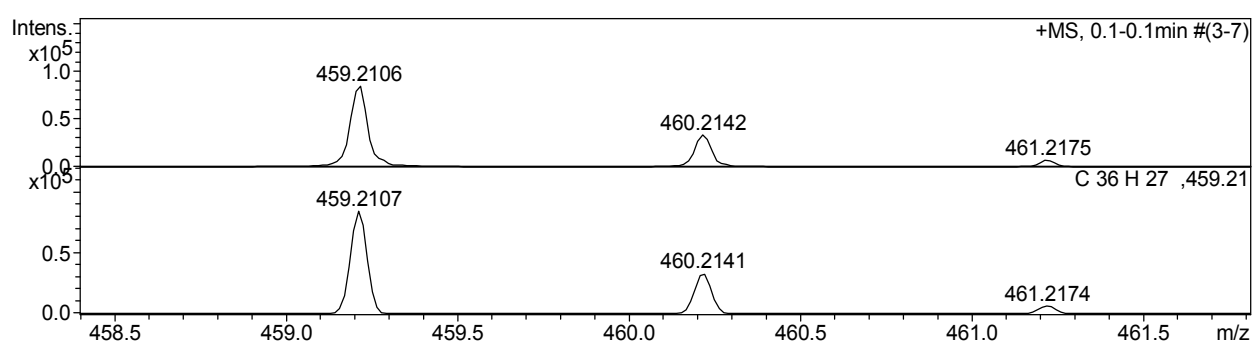

**Fig. S23.** Mass spectra of (A)  $(R_p)$ -14 and  $(S_p)$ -14; upper and lower spectra show observed and calculated spectra, respectively.

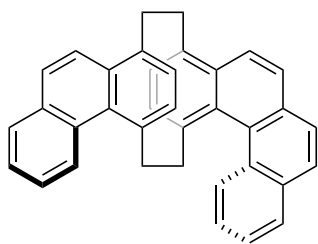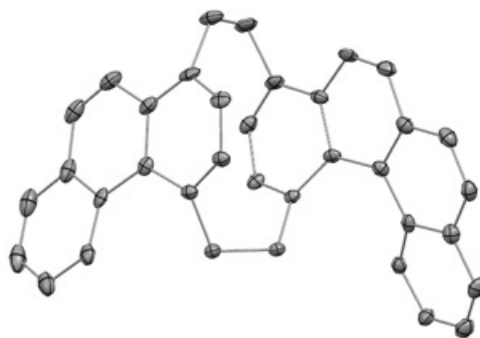

Top view

Side view

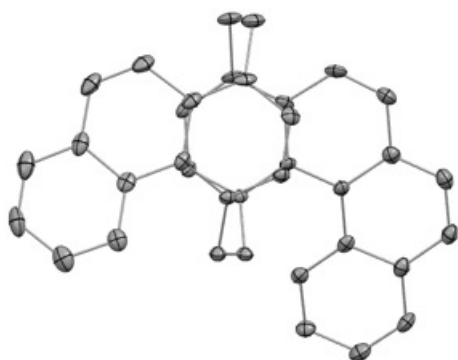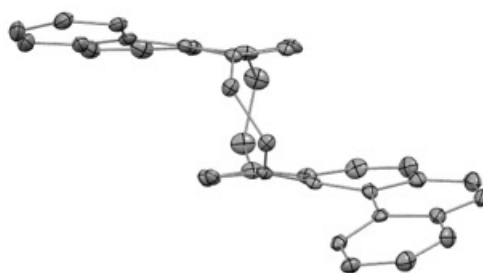

**Fig. S24.** ORTEP drawings of (*R<sub>p</sub>*)-**14** (CCDC-2214410). Thermal ellipsoids are drawn at the 30% probability level. Hydrogen atoms are omitted for clarity.

**Table S5.** Crystallographic data for (*R*<sub>p</sub>)-14.

|                                                                            |                                 |
|----------------------------------------------------------------------------|---------------------------------|
| Formula                                                                    | C <sub>36</sub> H <sub>26</sub> |
| Formula weight                                                             | 458.57                          |
| Temperature (K)                                                            | 123                             |
| Crystal color, habit                                                       | colourless,plate                |
| Crystal size, mm                                                           | 0.05×0.02×0.01                  |
| Crystal system                                                             | monoclinic                      |
| Space group                                                                | <i>P</i> 2 <sub>1</sub> (#4)    |
| <i>a</i> , Å                                                               | 9.1321(8)                       |
| <i>b</i> , Å                                                               | 9.8490(9)                       |
| <i>c</i> , Å                                                               | 13.2407(12)                     |
| $\alpha$ , deg                                                             | 90                              |
| $\beta$ , deg                                                              | 98.635(9)                       |
| $\gamma$ , deg                                                             | 90                              |
| <i>V</i> , Å <sup>3</sup>                                                  | 1177.40(19)                     |
| <i>Z</i> value                                                             | 2                               |
| <i>D</i> <sub>calcd</sub> , g cm <sup>-3</sup>                             | 1.293                           |
| $\mu$ (MoK $\alpha$ ), cm <sup>-1</sup>                                    | 0.073                           |
| <i>F</i> (000)                                                             | 484.0                           |
| 2 $\theta$ <sub>max</sub> , deg                                            | 62.254                          |
| No. of reflections measured                                                | 11438                           |
| No. of observed reflections                                                | 6335                            |
| No. of variables                                                           | 325                             |
| <i>R</i> <sub>1</sub> ( <i>I</i> > 2 $\sigma$ ( <i>I</i> )) <sup>[a]</sup> | 0.0776(3684)                    |
| w <i>R</i> <sub>2</sub> (all reflns) <sup>[b]</sup>                        | 0.1748(6335)                    |
| Goodness of fit                                                            | 1.015                           |
| Flack Parameter                                                            | 2.0 (10)                        |

[a]  $R_1 = \Sigma(|F_o| - |F_c|) / \Sigma(|F_o|)$ . [b]  $wR_2 = [\Sigma[w(F_o^2 - F_c^2)^2] / \Sigma w(F_o^2)^2]^{1/2}$ .

Recrystallization solvent : chloroform / methanol

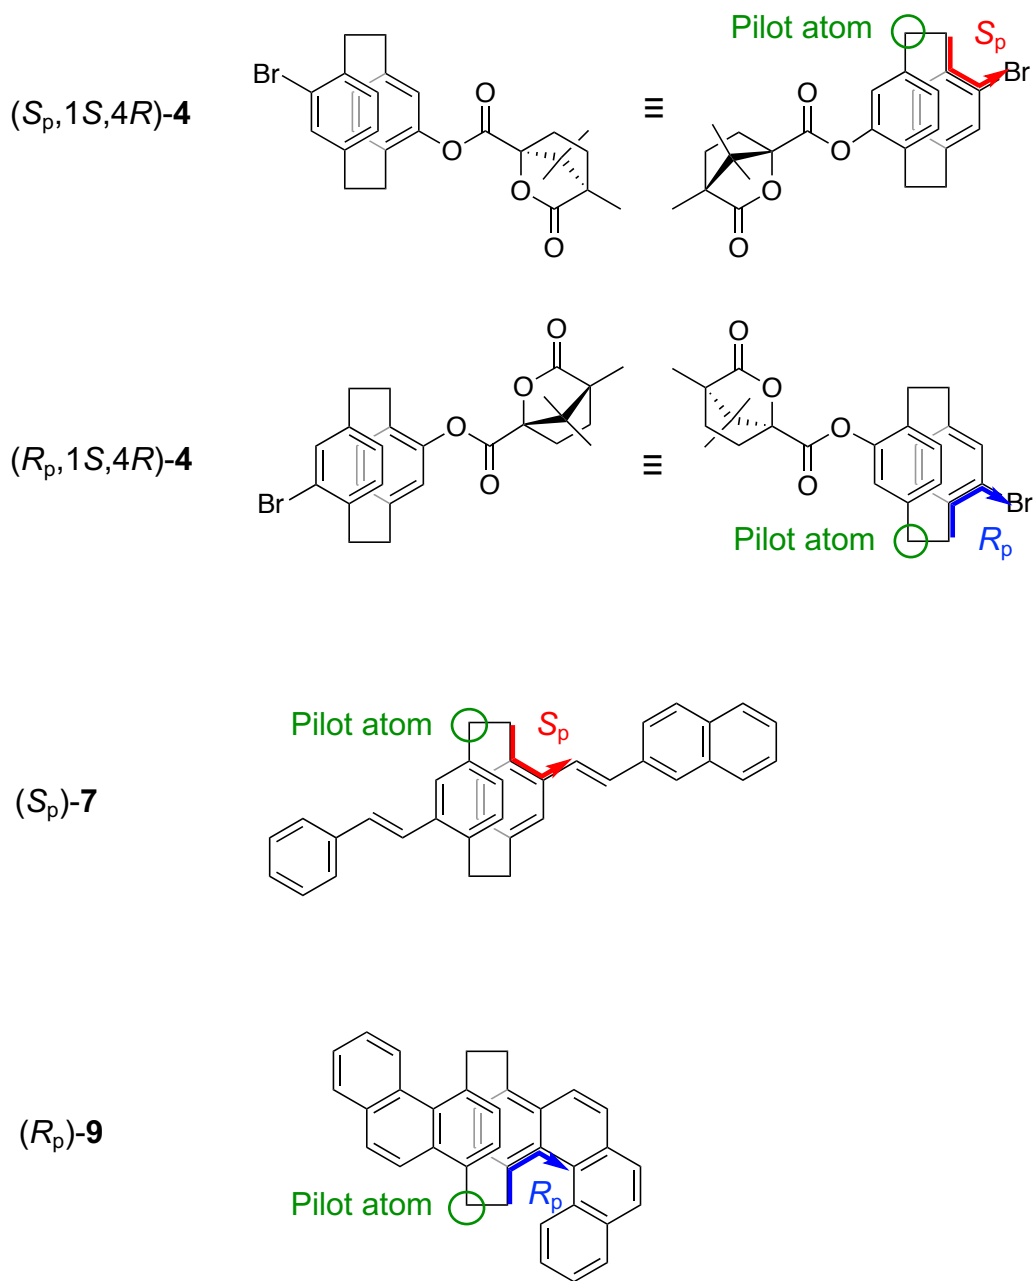

**Fig. S25.** Absolute configurations of planar chiral molecules **4**, **7**, and **9**.

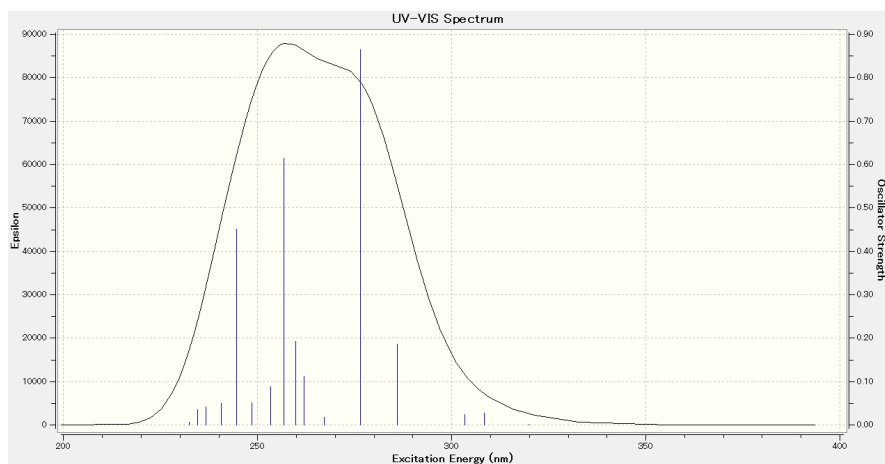

**Fig. S26.** Simulated UV-vis spectrum (half-width at half height = 0.20 eV) of (*R<sub>p</sub>*)-**10** by TD-DFT calculation (TD-CAM-B3LYP(CHCl<sub>3</sub>)/6-31G(d)//CAM-B3LYP(CHCl<sub>3</sub>)/6-31G(d)).

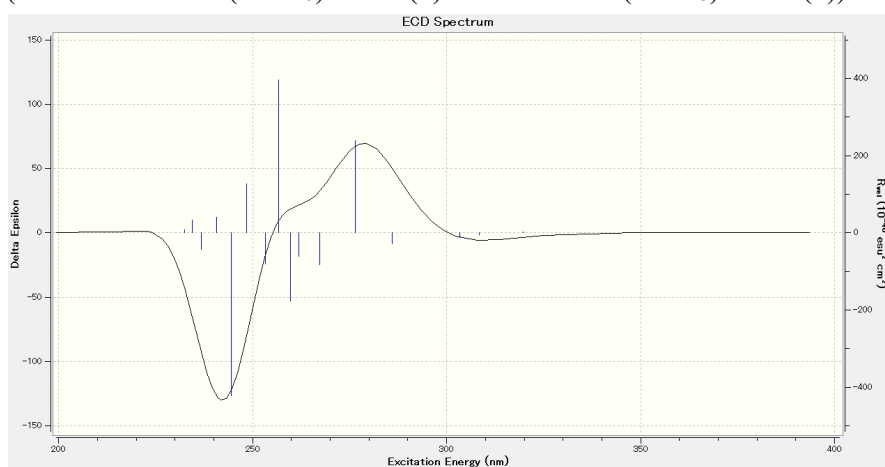

**Fig. S27.** Simulated ECD spectrum (half-width at half height = 0.20 eV) of (*R<sub>p</sub>*)-**10** by TD-DFT calculation (TD-CAM-B3LYP(CHCl<sub>3</sub>)/6-31G(d)//CAM-B3LYP(CHCl<sub>3</sub>)/6-31G(d)).

**Table S6.** Selected data for excitation energy, major configuration, coefficient, oscillator strength, and rotatory strengths for (*R<sub>p</sub>*)-**10**.<sup>a</sup>

| State           | Excitation energy<br>/ eV (/ nm) | Major<br>Configuration | Coefficient | Oscillator<br>strength | Rotatory Strengths<br>/ 10 <sup>-40</sup> esu <sup>2</sup> cm <sup>2</sup> |
|-----------------|----------------------------------|------------------------|-------------|------------------------|----------------------------------------------------------------------------|
| S <sub>1</sub>  | 3.88 (319)                       | H→L+1                  | 0.42351     | 0.0020                 | 1.8037                                                                     |
| S <sub>2</sub>  | 4.02 (308)                       | H→L                    | 0.60759     | 0.0267                 | -5.2450                                                                    |
| S <sub>3</sub>  | 4.09 (303)                       | H-1→L+1                | 0.38266     | 0.0242                 | -11.3387                                                                   |
| S <sub>4</sub>  | 4.33 (286)                       | H-1→L+2                | 0.39231     | 0.1865                 | -27.7546                                                                   |
| S <sub>5</sub>  | 4.48 (277)                       | H-2→L                  | 0.43331     | 0.8645                 | 239.2795                                                                   |
| S <sub>6</sub>  | 4.64 (267)                       | H-2→L+1                | 0.39029     | 0.0179                 | -82.8554                                                                   |
| S <sub>7</sub>  | 4.73 (262)                       | H-1→L                  | 0.29806     | 0.1275                 | -60.8531                                                                   |
| S <sub>8</sub>  | 4.77 (260)                       | H-1→L+2                | 0.25041     | 0.1921                 | -176.4591                                                                  |
| S <sub>9</sub>  | 4.83 (257)                       | H-2→L+1                | 0.32718     | 0.6152                 | 397.3696                                                                   |
| S <sub>10</sub> | 4.90 (253)                       | H→L+2                  | 0.49447     | 0.0878                 | -81.2049                                                                   |
| S <sub>11</sub> | 4.99 (249)                       | H-4→L                  | 0.41195     | 0.0261                 | 128.1694                                                                   |
| S <sub>12</sub> | 5.07 (245)                       | H-3→L+1                | 0.38603     | 0.4512                 | -421.8813                                                                  |
| S <sub>13</sub> | 5.15 (241)                       | H→L+1                  | 0.30093     | 0.0503                 | 39.7007                                                                    |
| S <sub>14</sub> | 5.24 (237)                       | H→L+3                  | 0.33265     | 0.0413                 | -42.7019                                                                   |
| S <sub>15</sub> | 5.29 (234)                       | H-3→L                  | 0.39183     | 0.0356                 | 33.5135                                                                    |
| S <sub>16</sub> | 5.33 (232)                       | H→L+4                  | 0.27819     | 0.0072                 | 8.2541                                                                     |

<sup>a</sup> Estimated from TD-DFT calculations (TD-CAM-B3LYP/6-31G(d)) based on optimized structures determined by DFT calculation (CAM-B3LYP/6-31G(d)). H and L denote HOMO and LUMO.

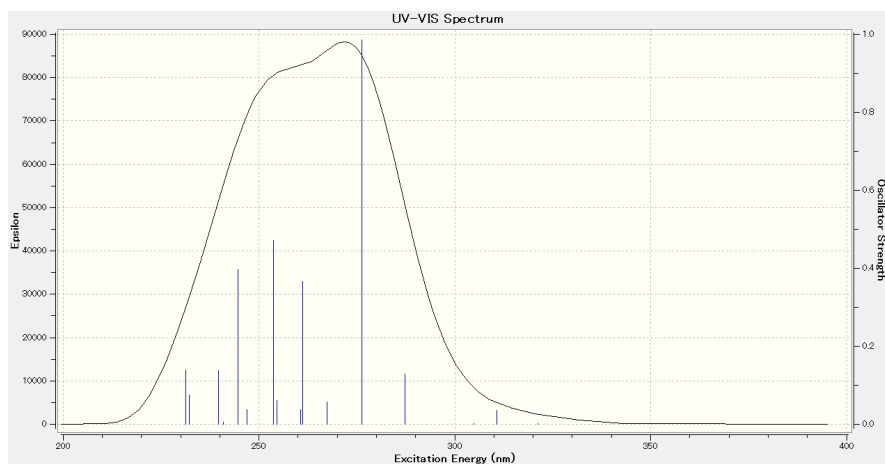

**Fig. S28.** Simulated UV-vis spectrum (half-width at half height = 0.20 eV) of (*R<sub>p</sub>*)-**14** by TD-DFT calculation (TD-CAM-B3LYP(CHCl<sub>3</sub>)/6-31G(d)//CAM-B3LYP(CHCl<sub>3</sub>)/6-31G(d)).

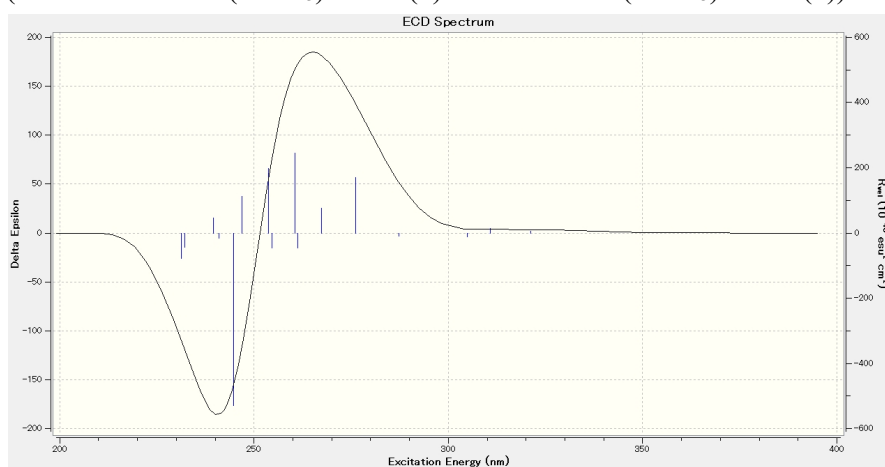

**Fig. S29.** Simulated ECD spectrum (half-width at half height = 0.20 eV) of (*R<sub>p</sub>*)-**14** by TD-DFT calculation (TD-CAM-B3LYP(CHCl<sub>3</sub>)/6-31G(d)//CAM-B3LYP(CHCl<sub>3</sub>)/6-31G(d)).

**Table S7.** Selected data for excitation energy, major configuration, coefficient, oscillator strength, and rotatory strengths for (*R<sub>p</sub>*)-**14**.<sup>a</sup>

| State           | Excitation energy<br>/ eV (/ nm) | Major<br>Configuration | Coefficient | Oscillator<br>strength | Rotatory Strengths<br>/ 10 <sup>-40</sup> esu <sup>2</sup> cm <sup>2</sup> |
|-----------------|----------------------------------|------------------------|-------------|------------------------|----------------------------------------------------------------------------|
| S <sub>1</sub>  | 3.86 (321)                       | H→L+1                  | 0.39875     | 0.0014                 | 4.8528                                                                     |
| S <sub>2</sub>  | 3.99 (311)                       | H→L                    | 0.57099     | 0.0367                 | 13.6274                                                                    |
| S <sub>3</sub>  | 4.07 (305)                       | H-1→L+3                | 0.27297     | 0.0016                 | -11.0044                                                                   |
| S <sub>4</sub>  | 4.32 (287)                       | H-1→L+2                | 0.33622     | 0.1288                 | -8.6206                                                                    |
| S <sub>5</sub>  | 4.49 (276)                       | H-2→L                  | 0.43620     | 0.9858                 | 170.3518                                                                   |
| S <sub>6</sub>  | 4.64 (267)                       | H-1→L                  | 0.39372     | 0.0570                 | 76.7423                                                                    |
| S <sub>7</sub>  | 4.75 (261)                       | H-4→L+1                | 0.21301     | 0.3658                 | -45.8299                                                                   |
| S <sub>8</sub>  | 4.76 (261)                       | H-2→L+1                | 0.41314     | 0.0369                 | 245.0402                                                                   |
| S <sub>9</sub>  | 4.87 (255)                       | H-2→L+2                | 0.38008     | 0.0612                 | -46.4189                                                                   |
| S <sub>10</sub> | 4.89 (254)                       | H→L+2                  | 0.29599     | 0.4712                 | 198.0918                                                                   |
| S <sub>11</sub> | 5.02 (247)                       | H-4→L                  | 0.39104     | 0.0383                 | 112.3381                                                                   |
| S <sub>12</sub> | 5.07 (245)                       | H-3→L+1                | 0.35699     | 0.000                  | -528.3133                                                                  |
| S <sub>13</sub> | 5.15 (241)                       | H→L+3                  | 0.45459     | 0.0058                 | -16.3965                                                                   |
| S <sub>14</sub> | 5.17 (240)                       | H-1→L+3                | 0.29850     | 0.1382                 | 45.7511                                                                    |
| S <sub>15</sub> | 5.34 (232)                       | H-3→L                  | 0.35620     | 0.0751                 | -44.5018                                                                   |
| S <sub>16</sub> | 5.36 (231)                       | H-4→L                  | 0.45069     | 0.1397                 | -77.9917                                                                   |

<sup>a</sup> Estimated from TD-DFT calculations (TD-CAM-B3LYP/6-31G(d)) based on optimized structures determined by DFT calculation (CAM-B3LYP/6-31G(d)). H and L denote HOMO and LUMO.

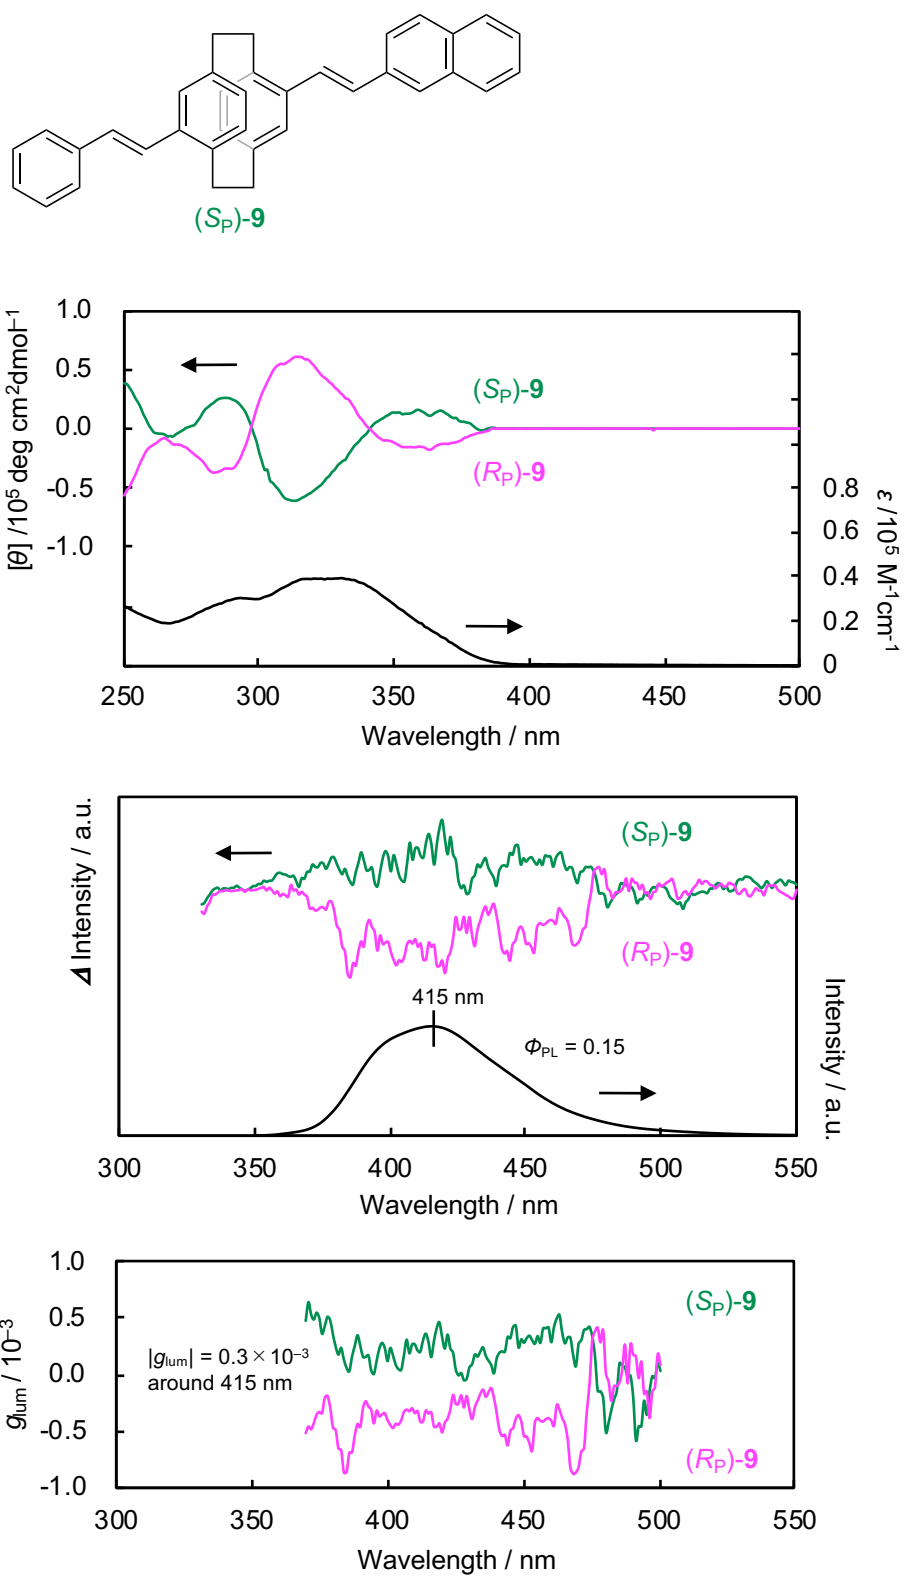

**Fig. S30.** UV, CD, PL, CPL spectra, and  $g_{\text{lum}}$  charts of **(S<sub>p</sub>)-9** and **(R<sub>p</sub>)-9** in CHCl<sub>3</sub> (1.0 × 10<sup>-5</sup> M). Excitation wavelength: 345 nm and 300 nm for PL and CPL, respectively.



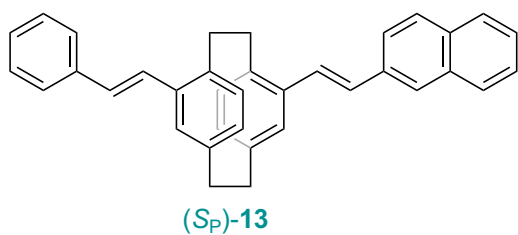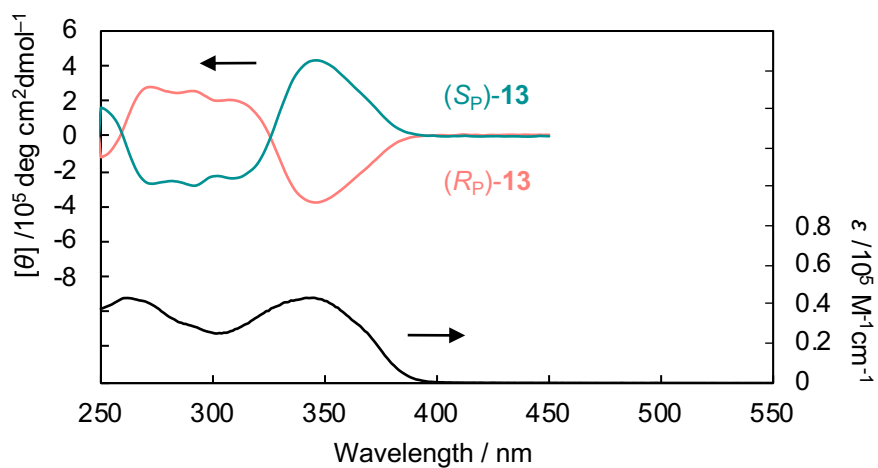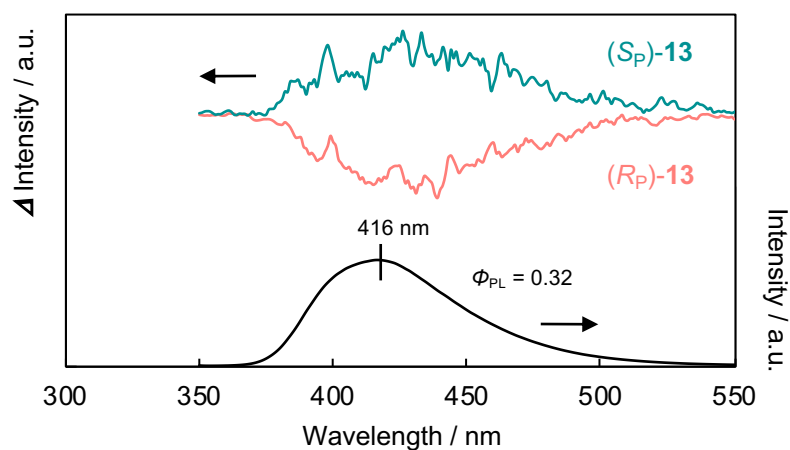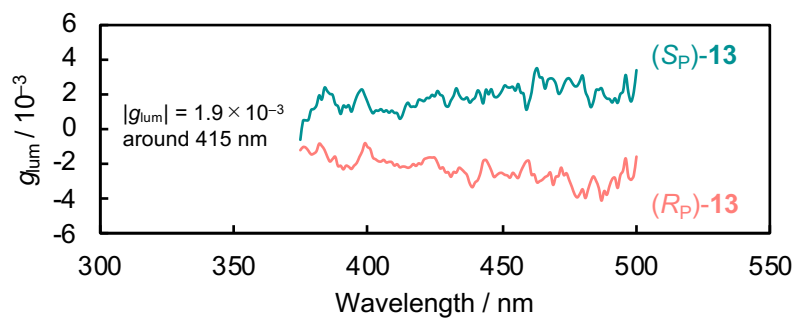

**Fig. S31.** UV, CD, PL, CPL spectra, and  $g_{\text{lum}}$  charts of (S<sub>P</sub>)- and (R<sub>P</sub>)-13 in CHCl<sub>3</sub> ( $1.0 \times 10^{-5}$  M). Excitation wavelength: 345 nm and 300 nm for PL and CPL, respectively.

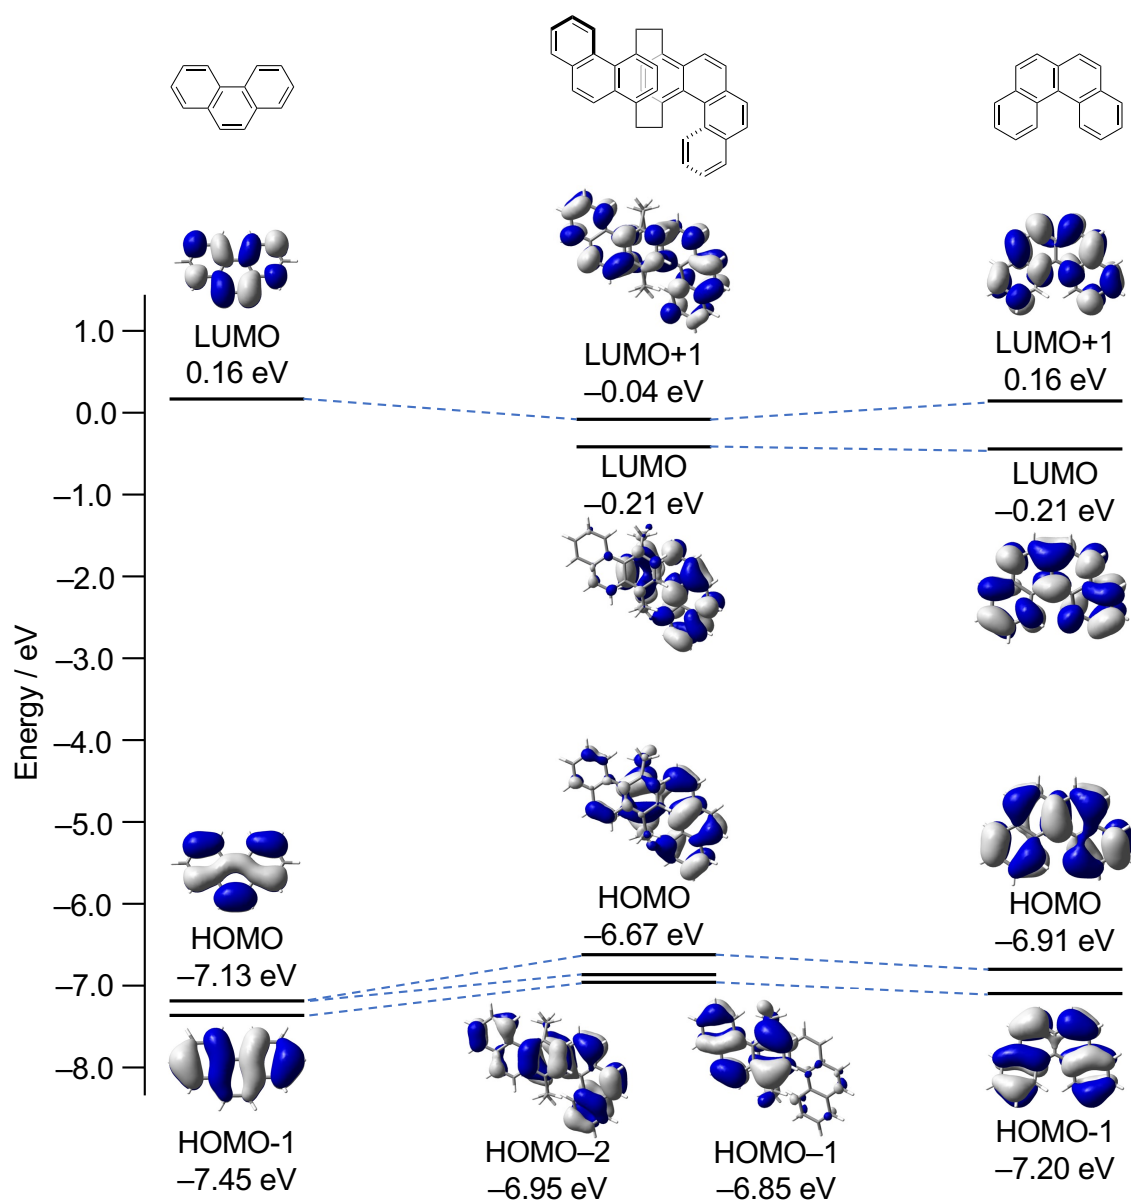

**Fig. S32.** Molecular orbitals of *(R<sub>p</sub>)*-10 with monomeric  $\pi$ -electron systems, phenanthrene and benzo[*c*]phenanthrene ((TD)-CAM-B3LYP(CHCl<sub>3</sub>)/6-31G(d)).

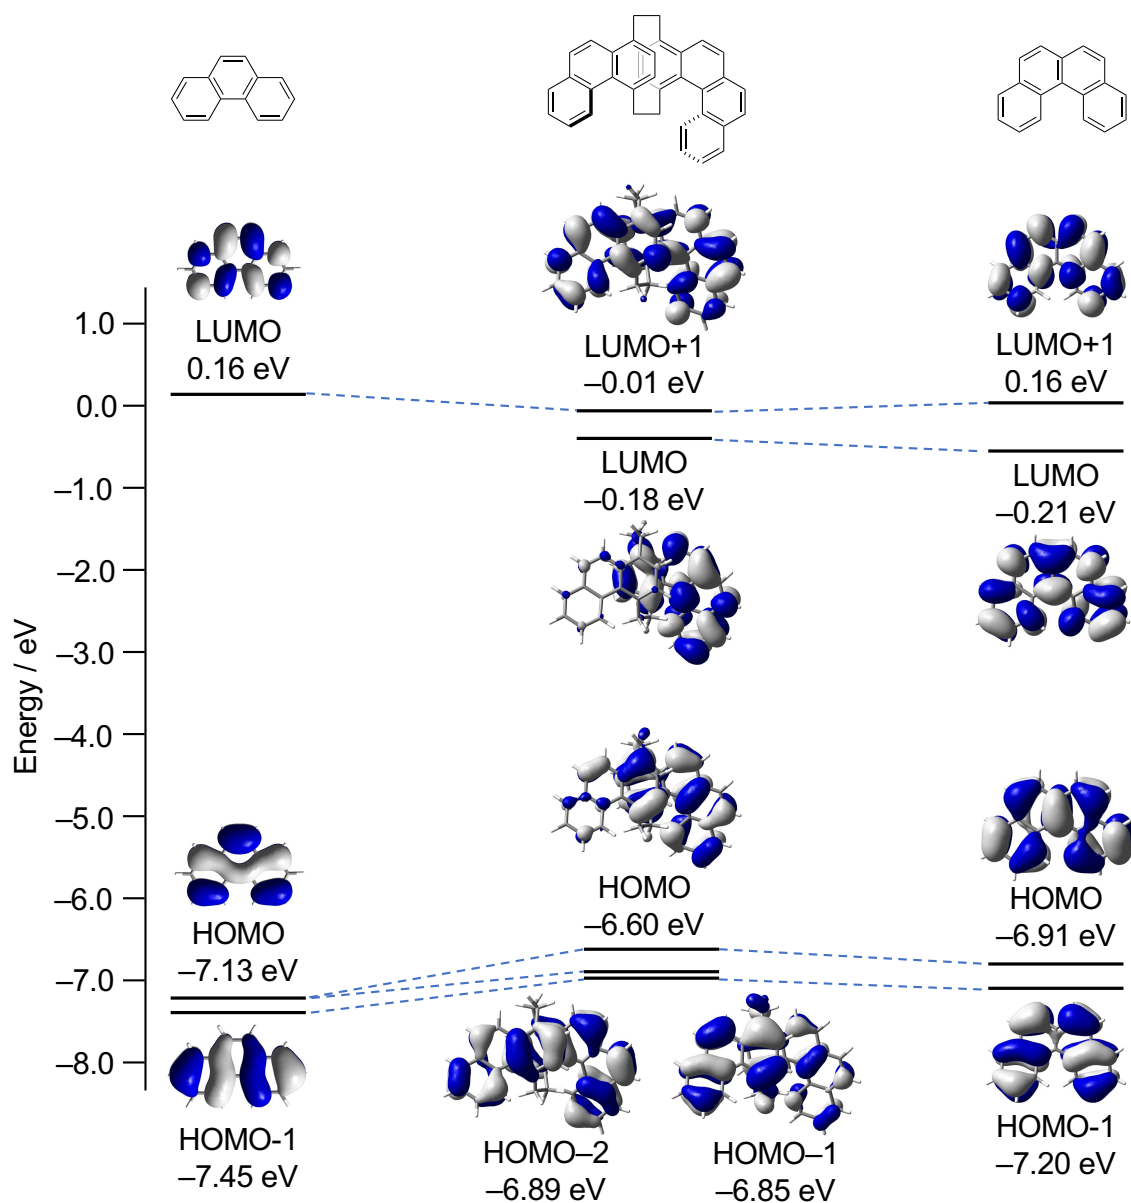

**Fig. S33.** Molecular orbitals of (*R<sub>p</sub>*)-14 with monomeric  $\pi$ -electron systems, phenanthrene and benzo[*c*]phenanthrene ((TD)-CAM-B3LYP(CHCl<sub>3</sub>)/6-31G(d)).

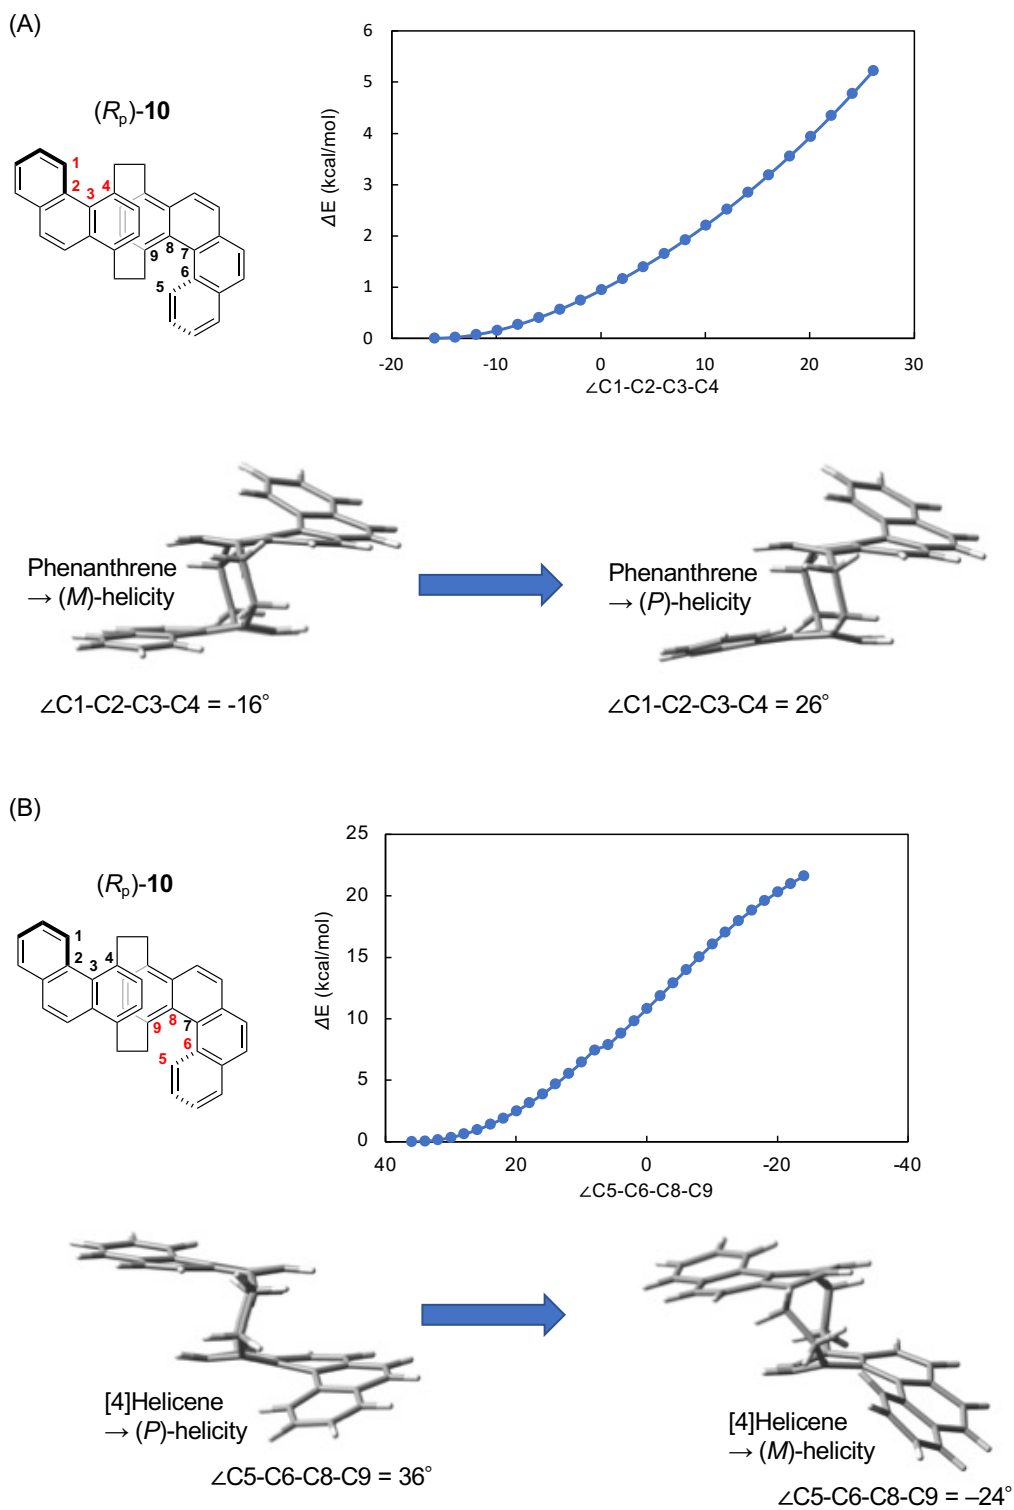

**Fig. S34.** Energy calculations of (A) flipped phenanthrene (from (*M*)-helicity to (*P*)-helicity) and (B) flipped [4]helicene (from (*P*)-helicity to (*M*)-helicity) in (*R<sub>p</sub>*)-10.

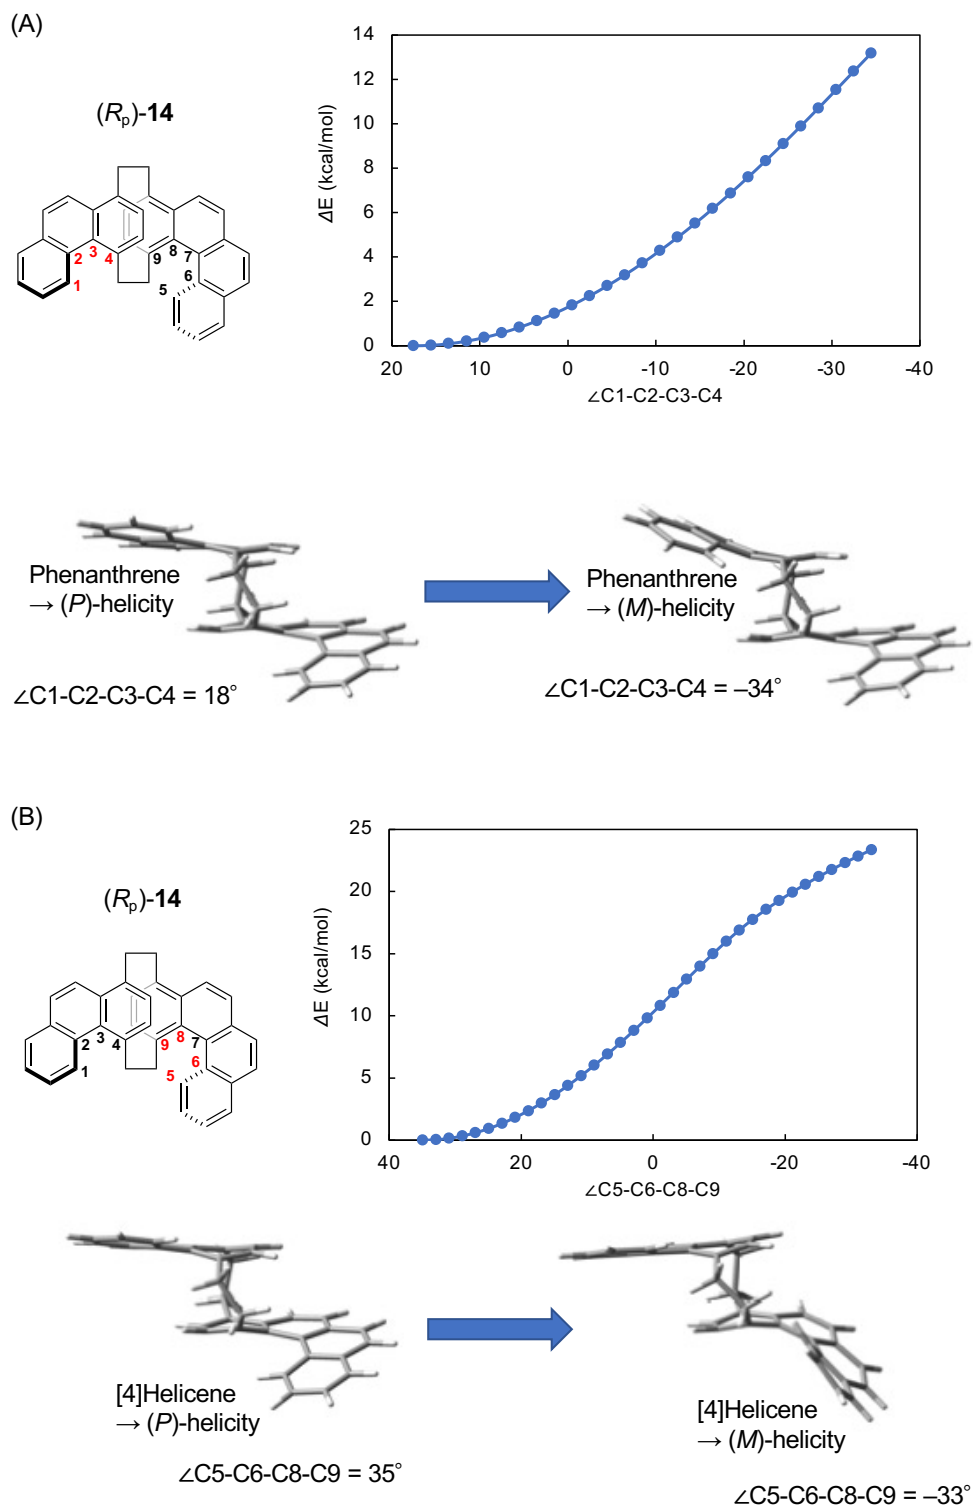

**Fig. S35.** Energy calculations of (A) flipped phenanthrene (from (*P*)-helicity to (*M*)-helicity) and (B) flipped [4]helicene (from (*P*)-helicity to (*M*)-helicity) in (*R<sub>p</sub>*)-14.

**Table S8.** Cartesian coordinate of (*R<sub>p</sub>*)-**10** in ground state (CAM-B3LYP(CHCl<sub>3</sub>)/6-31G(d)).

| atom | x         | y         | z         |
|------|-----------|-----------|-----------|
| C    | -6.543641 | -0.758407 | -0.643855 |
| C    | -5.624462 | -1.757745 | -0.43634  |
| C    | -4.342371 | -1.474232 | 0.080925  |
| C    | -3.963823 | -0.134412 | 0.352451  |
| H    | -7.528443 | -0.988654 | -1.037924 |
| H    | -5.878255 | -2.792531 | -0.649599 |
| C    | -2.627249 | 0.153043  | 0.858739  |
| C    | -2.06845  | 1.4706    | 0.932886  |
| C    | -1.800073 | -0.943476 | 1.230809  |
| C    | -0.948813 | 1.635703  | 1.722515  |
| C    | -0.493912 | -0.726427 | 1.7554    |
| C    | -0.170536 | 0.550738  | 2.146603  |
| H    | -0.539956 | 2.633146  | 1.851164  |
| H    | 0.7906    | 0.747174  | 2.613237  |
| C    | -2.247452 | -2.282241 | 0.974808  |
| C    | -3.441506 | -2.538855 | 0.395538  |
| H    | -3.756059 | -3.560097 | 0.199896  |
| H    | -1.598159 | -3.10587  | 1.250167  |
| C    | 0.602356  | -1.766296 | 1.688619  |
| H    | 0.324398  | -2.709979 | 2.170471  |
| H    | 1.456568  | -1.378019 | 2.250281  |
| C    | -6.208589 | 0.561244  | -0.301808 |
| H    | -6.9441   | 1.352502  | -0.408886 |
| C    | -4.957569 | 0.858238  | 0.189593  |
| H    | -4.753396 | 1.872389  | 0.500123  |
| C    | 1.085423  | -2.10427  | 0.225355  |
| C    | 0.790327  | -0.996672 | -0.776959 |
| H    | 2.136692  | -2.380894 | 0.293702  |
| H    | 0.553369  | -2.996114 | -0.118545 |
| C    | 1.379498  | 0.312907  | -0.739627 |
| C    | -0.347179 | -1.155284 | -1.537768 |
| C    | 0.535421  | 1.420965  | -1.057035 |

|   |           |           |           |
|---|-----------|-----------|-----------|
| C | 2.731441  | 0.581165  | -0.287432 |
| C | -1.111435 | -0.059927 | -1.970976 |
| H | -0.781632 | -2.145909 | -1.633177 |
| C | -0.775408 | 1.21359   | -1.581137 |
| C | 0.970115  | 2.738442  | -0.724226 |
| C | 3.047504  | 1.877238  | 0.159583  |
| C | 3.820679  | -0.379902 | -0.358996 |
| H | -2.07855  | -0.247537 | -2.42864  |
| C | -1.864323 | 2.264337  | -1.512123 |
| C | 2.139566  | 2.948988  | -0.07052  |
| H | 0.327764  | 3.578825  | -0.962031 |
| C | 4.297235  | 2.139709  | 0.802808  |
| C | 5.049094  | -0.093987 | 0.295859  |
| C | 3.77199   | -1.547453 | -1.158445 |
| H | -1.577658 | 3.204588  | -1.996112 |
| H | -2.723487 | 1.881896  | -2.070177 |
| H | 2.431864  | 3.949659  | 0.2348    |
| C | 5.237955  | 1.173813  | 0.926071  |
| H | 4.4698    | 3.136741  | 1.198028  |
| C | 6.106927  | -1.028997 | 0.24946   |
| C | 4.828398  | -2.425662 | -1.221072 |
| H | 2.891122  | -1.735527 | -1.759796 |
| H | 6.17631   | 1.368801  | 1.437048  |
| C | 6.000682  | -2.184325 | -0.484026 |
| H | 7.024386  | -0.797798 | 0.783553  |
| H | 4.758739  | -3.304115 | -1.855077 |
| H | 6.825544  | -2.888692 | -0.523831 |
| C | -2.336608 | 2.606671  | -0.047499 |
| H | -3.369757 | 2.944771  | -0.114817 |
| H | -1.76496  | 3.468311  | 0.307086  |

**Table S9.** Cartesian coordinate of ( $R_p$ )-**10** in  $S_1$  state (TD-CAM-B3LYP(CHCl<sub>3</sub>)/6-31G(d)).

| atom | x          | y          | z          |
|------|------------|------------|------------|
| C    | -6.5642944 | -0.7789578 | -0.6991692 |
| C    | -5.6403358 | -1.7721071 | -0.478473  |
| C    | -4.3658226 | -1.4786735 | 0.05007602 |
| C    | -3.9977883 | -0.1349527 | 0.31716987 |
| C    | -7.5436595 | -1.0173872 | -1.1018607 |
| C    | -5.8860739 | -2.8093598 | -0.6892096 |
| H    | -2.6662197 | 0.1632571  | 0.83330515 |
| H    | -2.1142049 | 1.48254318 | 0.89990185 |
| C    | -1.841165  | -0.927869  | 1.23467065 |
| C    | -0.9994319 | 1.66387051 | 1.69369884 |
| C    | -0.5495239 | -0.6990913 | 1.78618901 |
| C    | -0.2274496 | 0.58751238 | 2.14973009 |
| C    | -0.5961946 | 2.66470519 | 1.81222571 |
| C    | 0.72367821 | 0.79137575 | 2.63317333 |
| H    | -2.2791439 | -2.2703698 | 0.98010943 |
| H    | -3.4625669 | -2.5366715 | 0.38331839 |
| C    | -3.7685778 | -3.5607647 | 0.18920952 |
| C    | -1.6311431 | -3.0896419 | 1.27111327 |
| H    | 0.54546668 | -1.741521  | 1.78322458 |
| H    | 0.23760211 | -2.6848456 | 2.24591428 |
| C    | 1.36735579 | -1.3567493 | 2.3928916  |
| H    | -6.2418649 | 0.54321232 | -0.3577244 |
| H    | -6.9819425 | 1.32910409 | -0.4725171 |
| C    | -4.9965641 | 0.84999966 | 0.14423314 |
| H    | -4.8028513 | 1.8658928  | 0.45632933 |
| H    | 1.11053143 | -2.0690873 | 0.34588429 |
| C    | 0.81025531 | -0.9831383 | -0.6698747 |
| C    | 2.17432747 | -2.2762857 | 0.45720205 |
| H    | 0.64721764 | -2.9931836 | -0.0123225 |
| H    | 1.42070567 | 0.31196667 | -0.6730628 |
| C    | -0.3300374 | -1.1630396 | -1.4516927 |
| C    | 0.54683018 | 1.45114214 | -1.0028963 |

|   |            |            |            |
|---|------------|------------|------------|
| C | 2.77589305 | 0.57335092 | -0.2985155 |
| C | -1.0814706 | -0.0761561 | -1.917523  |
| C | -0.7452909 | -2.1609394 | -1.5515179 |
| H | -0.7448438 | 1.22182718 | -1.5439372 |
| C | 0.9853212  | 2.74513477 | -0.664363  |
| C | 3.11863869 | 1.90789673 | 0.16205395 |
| C | 3.84974623 | -0.3780844 | -0.4079635 |
| H | -2.0330695 | -0.2631425 | -2.4051538 |
| H | -1.835868  | 2.2675983  | -1.5331644 |
| C | 2.20750928 | 2.96132481 | -0.0498154 |
| C | 0.33784062 | 3.59194697 | -0.8620189 |
| C | 4.36026986 | 2.1310375  | 0.79369269 |
| H | 5.10635632 | -0.1119022 | 0.25118635 |
| C | 3.77262529 | -1.5466195 | -1.2022049 |
| C | -1.5201529 | 3.20586587 | -2.0028923 |
| H | -2.6661787 | 1.88635578 | -2.133825  |
| H | 2.49654566 | 3.96581309 | 0.24459273 |
| C | 5.3098359  | 1.13672019 | 0.88444384 |
| H | 4.55942844 | 3.11571264 | 1.20669544 |
| H | 6.13181486 | -1.0812122 | 0.20337854 |
| C | 4.80739845 | -2.4566137 | -1.2625788 |
| C | 2.88010603 | -1.7168942 | -1.7934437 |
| C | 6.25483047 | 1.32325221 | 1.38566058 |
| H | 5.99070864 | -2.2388906 | -0.5295771 |
| C | 7.05603372 | -0.8805165 | 0.73830302 |
| H | 4.71112716 | -3.3395957 | -1.8862292 |
| H | 6.7958831  | -2.965548  | -0.5661679 |
| H | -2.3783579 | 2.60873441 | -0.092171  |
| H | -3.4176278 | 2.91267864 | -0.2037479 |
| H | -1.8469353 | 3.4891241  | 0.27823617 |

**Table S10.** Cartesian coordinate of (*R<sub>p</sub>*)-**14** in ground state (CAM-B3LYP(CHCl<sub>3</sub>)/6-31G(d)).

| atom | x         | y         | z         |
|------|-----------|-----------|-----------|
| C    | -5.420369 | 0.119258  | -1.175829 |
| C    | -4.781778 | 1.313285  | -1.150618 |
| C    | -3.53883  | 1.472865  | -0.463493 |
| C    | -2.911996 | 0.371263  | 0.145828  |
| C    | -3.696797 | -0.843645 | 0.299012  |
| C    | -4.922477 | -0.976986 | -0.40839  |
| H    | -6.351681 | -0.004776 | -1.720731 |
| H    | -5.198183 | 2.176094  | -1.662629 |
| C    | -1.564527 | 0.533498  | 0.658847  |
| C    | -0.653214 | -0.555638 | 0.861405  |
| C    | -1.063541 | 1.856923  | 0.853185  |
| C    | 0.441828  | -0.325691 | 1.66379   |
| C    | 0.221151  | 2.06479   | 1.43097   |
| C    | 0.859125  | 0.976513  | 1.980625  |
| H    | 1.120346  | -1.145195 | 1.885583  |
| H    | 1.81521   | 1.108898  | 2.478651  |
| C    | -1.804399 | 2.959091  | 0.328408  |
| C    | -2.953785 | 2.767777  | -0.365238 |
| H    | -3.479776 | 3.60849   | -0.808465 |
| H    | -1.415179 | 3.96272   | 0.457834  |
| C    | -0.645442 | -1.791008 | -0.034712 |
| H    | -1.463399 | -1.71497  | -0.75184  |
| H    | -0.819459 | -2.717392 | 0.523083  |
| C    | 1.018238  | 3.333616  | 1.211517  |
| H    | 0.46597   | 4.241854  | 1.473747  |
| H    | 1.888344  | 3.300581  | 1.873318  |
| C    | 1.523217  | 3.476511  | -0.276183 |
| C    | 1.706915  | 2.130125  | -0.941816 |
| H    | 2.431313  | 4.087509  | -0.27036  |
| H    | 0.778356  | 4.037031  | -0.847939 |
| C    | 2.736187  | 1.222738  | -0.571882 |
| C    | 0.692713  | 1.651365  | -1.742607 |

|   |           |           |           |
|---|-----------|-----------|-----------|
| C | 2.578555  | -0.172154 | -0.801271 |
| C | 3.896989  | 1.685522  | 0.135442  |
| C | 0.483349  | 0.272613  | -1.877401 |
| H | -0.07397  | 2.331296  | -2.102013 |
| C | 3.690819  | -1.056503 | -0.48649  |
| C | 1.310745  | -0.643247 | -1.262746 |
| C | 4.867891  | 0.838666  | 0.547255  |
| H | 3.989385  | 2.746034  | 0.342376  |
| H | -0.458659 | -0.062324 | -2.303516 |
| C | 4.810141  | -0.554142 | 0.222844  |
| C | 3.753101  | -2.395359 | -0.937847 |
| C | 0.703665  | -1.967781 | -0.814035 |
| H | 5.733764  | 1.209693  | 1.088306  |
| C | 5.881647  | -1.412304 | 0.546881  |
| C | 4.815374  | -3.213716 | -0.62435  |
| H | 1.406039  | -2.480978 | -0.157739 |
| H | 0.512688  | -2.648971 | -1.652381 |
| C | 5.883358  | -2.72716  | 0.146136  |
| H | 6.720963  | -1.005996 | 1.104673  |
| H | 6.716619  | -3.376442 | 0.395795  |
| C | -5.679688 | -2.163756 | -0.288172 |
| C | -3.362302 | -1.873017 | 1.21179   |
| C | -4.133224 | -3.003738 | 1.340268  |
| H | -3.851849 | -3.766084 | 2.060151  |
| C | -5.290591 | -3.170389 | 0.559559  |
| H | -5.887318 | -4.072233 | 0.653197  |
| H | -6.598201 | -2.250688 | -0.862    |
| H | -2.495136 | -1.750699 | 1.847557  |
| H | 4.832772  | -4.235676 | -0.990361 |
| H | 2.968747  | -2.778892 | -1.578391 |



**Table S11.** Cartesian coordinate of (*R<sub>p</sub>*)-**14** in S<sub>1</sub> state (TD-CAM-B3LYP(CHCl<sub>3</sub>)/6-31G(d)).

| atom | x         | y         | z         |
|------|-----------|-----------|-----------|
| C    | -5.413134 | 0.075369  | -1.175816 |
| C    | -4.772988 | 1.294574  | -1.181456 |
| C    | -3.562833 | 1.496247  | -0.482315 |
| C    | -2.916804 | 0.368703  | 0.163566  |
| C    | -3.695016 | -0.827523 | 0.345988  |
| C    | -4.926375 | -0.99448  | -0.387448 |
| H    | -6.336128 | -0.060997 | -1.731598 |
| H    | -5.196903 | 2.130177  | -1.730837 |
| C    | -1.570377 | 0.527114  | 0.615563  |
| C    | -0.650952 | -0.554587 | 0.796444  |
| C    | -1.048695 | 1.888103  | 0.812688  |
| C    | 0.444917  | -0.345818 | 1.632939  |
| C    | 0.221099  | 2.066926  | 1.41756   |
| C    | 0.856855  | 0.953246  | 1.964659  |
| H    | 1.102017  | -1.177073 | 1.871173  |
| H    | 1.796441  | 1.086204  | 2.491957  |
| C    | -1.777546 | 2.967215  | 0.277659  |
| C    | -2.970877 | 2.772202  | -0.397926 |
| H    | -3.487697 | 3.616086  | -0.84481  |
| H    | -1.383297 | 3.972524  | 0.373912  |
| C    | -0.654274 | -1.777669 | -0.105879 |
| H    | -1.479628 | -1.692319 | -0.814226 |
| H    | -0.828547 | -2.704381 | 0.452786  |
| C    | 1.023817  | 3.335044  | 1.241621  |
| H    | 0.459269  | 4.236038  | 1.504102  |
| H    | 1.878085  | 3.294752  | 1.923185  |
| C    | 1.557472  | 3.496304  | -0.233942 |
| C    | 1.725761  | 2.153154  | -0.909388 |
| H    | 2.477091  | 4.088703  | -0.204591 |
| H    | 0.832933  | 4.077976  | -0.809955 |
| C    | 2.736683  | 1.228384  | -0.534016 |
| C    | 0.710489  | 1.698649  | -1.723534 |

|   |           |           |           |
|---|-----------|-----------|-----------|
| C | 2.571202  | -0.162184 | -0.795205 |
| C | 3.890363  | 1.665444  | 0.201148  |
| C | 0.487029  | 0.323877  | -1.880678 |
| H | -0.042056 | 2.393849  | -2.082488 |
| C | 3.675424  | -1.060938 | -0.48897  |
| C | 1.307868  | -0.611979 | -1.282637 |
| C | 4.847952  | 0.801759  | 0.608754  |
| H | 3.988656  | 2.720139  | 0.433183  |
| H | -0.449977 | 0.002603  | -2.327179 |
| C | 4.786593  | -0.583135 | 0.249564  |
| C | 3.73943   | -2.385903 | -0.977523 |
| C | 0.692736  | -1.948658 | -0.886799 |
| H | 5.707895  | 1.153722  | 1.171492  |
| C | 5.848457  | -1.454748 | 0.566492  |
| C | 4.793457  | -3.218356 | -0.670404 |
| H | 1.386939  | -2.491582 | -0.246447 |
| H | 0.49843   | -2.595716 | -1.750994 |
| C | 5.85044   | -2.758831 | 0.129898  |
| H | 6.68112   | -1.067973 | 1.147617  |
| H | 6.676807  | -3.418652 | 0.37477   |
| C | -5.651318 | -2.19873  | -0.262921 |
| C | -3.358603 | -1.837838 | 1.27733   |
| C | -4.106904 | -2.989732 | 1.403288  |
| H | -3.817853 | -3.739928 | 2.132557  |
| C | -5.250443 | -3.19039  | 0.605538  |
| H | -5.826308 | -4.105459 | 0.697345  |
| H | -6.55631  | -2.319177 | -0.852208 |
| H | -2.503394 | -1.687681 | 1.925506  |
| H | 4.812376  | -4.229377 | -1.065285 |
| H | 2.964622  | -2.747337 | -1.642006 |
